# Supplementary material for: Acute stress of the healthcare workforce during the COVID-19 pandemic evolution: a cross-sectional study in Spain
Source: PubMed Central journal article supplement — BMJ Open. 2020 Nov 6;10(11):e042555. doi: 10.1136/bmjopen-2020-042555 (PMC7650075; doi:10.1136/bmjopen-2020-042555), 2020-11-06
Supplement: bmjopen-2020-042555.draft_revisions.pdf [file bmjopen-2020-042555.draft_revisions.pdf]

# BMJ Open

BMJ Open is committed to open peer review. As part of this commitment we make the peer review history of every article we publish publicly available.

When an article is published we post the peer reviewers' comments and the authors' responses online. We also post the versions of the paper that were used during peer review. These are the versions that the peer review comments apply to.

The versions of the paper that follow are the versions that were submitted during the peer review process. They are not the versions of record or the final published versions. They should not be cited or distributed as the published version of this manuscript.

BMJ Open is an open access journal and the full, final, typeset and author-corrected version of record of the manuscript is available on our site with no access controls, subscription charges or pay-per-view fees (<http://bmjopen.bmj.com>).

If you have any questions on BMJ Open's open peer review process please email [info.bmjopen@bmj.com](mailto:info.bmjopen@bmj.com)

# BMJ Open

## Acute Stress of the Healthcare Workforce during the COVID-19 pandemic evolution. A cross-sectional study in Spain

|                               |                                                                                                                                                                                                                                                                                                                                                                                                                                                                                                                                                                                                                                                                                                                                                                                                                                                 |
|-------------------------------|-------------------------------------------------------------------------------------------------------------------------------------------------------------------------------------------------------------------------------------------------------------------------------------------------------------------------------------------------------------------------------------------------------------------------------------------------------------------------------------------------------------------------------------------------------------------------------------------------------------------------------------------------------------------------------------------------------------------------------------------------------------------------------------------------------------------------------------------------|
| Journal:                      | <i>BMJ Open</i>                                                                                                                                                                                                                                                                                                                                                                                                                                                                                                                                                                                                                                                                                                                                                                                                                                 |
| Manuscript ID                 | bmjopen-2020-042555                                                                                                                                                                                                                                                                                                                                                                                                                                                                                                                                                                                                                                                                                                                                                                                                                             |
| Article Type:                 | Original research                                                                                                                                                                                                                                                                                                                                                                                                                                                                                                                                                                                                                                                                                                                                                                                                                               |
| Date Submitted by the Author: | 08-Jul-2020                                                                                                                                                                                                                                                                                                                                                                                                                                                                                                                                                                                                                                                                                                                                                                                                                                     |
| Complete List of Authors:     | Mira, José ; Miguel Hernandez University of Elche, Health Psychology; Alicante-Sant Joan Health District, Carrillo, Irene; Miguel Hernandez University of Elche, Health Psychology; FISABIO, Guilabert, Mercedes; Miguel Hernandez University of Elche, Health Psychology<br>Mula, Aurora; Foundation for the Promotion of Health and Biomedical Research of Valencia Region (FISABIO)<br>Martin, Jimmy; Foundation for the Promotion of Health and Biomedical Research of Valencia Region (FISABIO)<br>Pérez-Jover, M <sup>a</sup> Virtudes; Miguel Hernandez University of Elche, Health Psychology<br>Vicente, M <sup>a</sup> Asunción ; Miguel Hernandez University of Elche, Department of Systems Engineering and Automation<br>Fernández , César; Miguel Hernandez University of Elche, Department of Systems Engineering and Automation |
| Keywords:                     | Health policy < HEALTH SERVICES ADMINISTRATION & MANAGEMENT, Organisation of health services < HEALTH SERVICES ADMINISTRATION & MANAGEMENT, Quality in health care < HEALTH SERVICES ADMINISTRATION & MANAGEMENT, Anxiety disorders < PSYCHIATRY, Depression & mood disorders < PSYCHIATRY, PUBLIC HEALTH                                                                                                                                                                                                                                                                                                                                                                                                                                                                                                                                       |
|                               |                                                                                                                                                                                                                                                                                                                                                                                                                                                                                                                                                                                                                                                                                                                                                                                                                                                 |

SCHOLARONE™  
Manuscripts

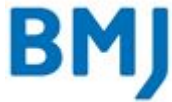

I, the Submitting Author has the right to grant and does grant on behalf of all authors of the Work (as defined in the below author licence), an exclusive licence and/or a non-exclusive licence for contributions from authors who are: i) UK Crown employees; ii) where BMJ has agreed a CC-BY licence shall apply, and/or iii) in accordance with the terms applicable for US Federal Government officers or employees acting as part of their official duties; on a worldwide, perpetual, irrevocable, royalty-free basis to BMJ Publishing Group Ltd ("BMJ") its licensees and where the relevant Journal is co-owned by BMJ to the co-owners of the Journal, to publish the Work in this journal and any other BMJ products and to exploit all rights, as set out in our [licence](#).

The Submitting Author accepts and understands that any supply made under these terms is made by BMJ to the Submitting Author unless you are acting as an employee on behalf of your employer or a postgraduate student of an affiliated institution which is paying any applicable article publishing charge ("APC") for Open Access articles. Where the Submitting Author wishes to make the Work available on an Open Access basis (and intends to pay the relevant APC), the terms of reuse of such Open Access shall be governed by a Creative Commons licence – details of these licences and which [Creative Commons](#) licence will apply to this Work are set out in our licence referred to above.

Other than as permitted in any relevant BMJ Author's Self Archiving Policies, I confirm this Work has not been accepted for publication elsewhere, is not being considered for publication elsewhere and does not duplicate material already published. I confirm all authors consent to publication of this Work and authorise the granting of this licence.

1  
2  
3  
4 **Acute Stress of the Healthcare Workforce during the COVID-19 pandemic evolution. A**  
5  
6 **cross-sectional study in Spain**  
7

8  
9 José Joaquín Mira<sup>1,2\*</sup>, Irene Carrillo<sup>2,3</sup>, Mercedes Guilabert<sup>2</sup>, Aurora Mula<sup>3</sup>, Jimmy Martin-  
10  
11 Delgado<sup>3</sup>, María Virtudes Pérez-Pérez<sup>2</sup>, María Asunción Vicente<sup>4</sup>, César Fernández<sup>4</sup> on  
12  
13 behalf of SARS-CoV-2 Second Victim Study Group†  
14  
15

16  
17 **\* Corresponding author:** José Joaquín Mira; Postal address: Avenida de la Universidad,  
18  
19 s/n, 03202 Elche, Alicante (Spain); e-mail: jose.mira@umh.es; Telephone: +34  
20  
21 966658984  
22

23  
24  
25 <sup>1</sup> Alicante-Sant Joan Health District, Alicante, Spain.

26  
27 <sup>2</sup> Department of Health Psychology, Miguel Hernández University, Elche, Spain.

28  
29  
30 <sup>3</sup> Foundation for the Promotion of Health and Biomedical Research of Valencia Region  
31  
32 (FISABIO), San Juan de Alicante, Spain.

33  
34  
35 <sup>4</sup> Department of Systems Engineering and Automation, Miguel Hernández University,  
36  
37 Elche, Spain.

38  
39  
40 † SARS-CoV-2 Second Victim Study Group: Ángel Cobos-Vargas, Olga Beatriz  
41  
42 Martínez-García (Hospital Universitario Clínico San Cecilio de Granada, Andalucía,  
43  
44 Spain), M<sup>a</sup> José Bueno-Domínguez (Grup SAGESSA, Reus, Spain), María Pilar Astier-  
45  
46 Peña (Centro de Salud “La Jota”, Zaragoza, Spain), Pastora Pérez-Pérez (Sociedad  
47  
48 Española de Calidad Asistencial, Spain), Matilde Lahera-Martín, Carmen Silvestre-  
49  
50 Busto (Servicio Navarro de Salud-Osasunbidea), Susana Lorenzo-Martínez (Hospital  
51  
52 Universitario Fundación Alcorcón, Madrid, Spain), Ascensión Sánchez-Martínez  
53  
54 (Hospital General Universitario Reina Sofía, Murcia, Spain), Bárbara Marco-Gómez,  
55  
56 Cristina Abad-Bouzán (Zona de Salud de Calatayud, Zaragoza, Spain), Carlos Aibar-  
57  
58  
59  
60

1  
2  
3 Remón (Hospital Clínico Universitario Lozano Blesa, Zaragoza), and Jesús María  
4  
5  
6 Aranaz-Andrés (Hospital Universitario Ramón y Cajal).  
7  
8  
9  
10

11 **Keywords:** COVID-19, healthcare professionals, psychological impact, acute stress,  
12  
13  
14 mental health, hospital, primary care  
15  
16

17 **Word count:** 3,104  
18  
19  
20  
21  
22  
23  
24  
25  
26  
27  
28  
29  
30  
31  
32  
33  
34  
35  
36  
37  
38  
39  
40  
41  
42  
43  
44  
45  
46  
47  
48  
49  
50  
51  
52  
53  
54  
55  
56  
57  
58  
59  
60

## Abstract

Objectives: To determine the volume of health professionals who present a high level of acute stress due to their care of patients with COVID-19 that may prevent them from carrying out their functions and to analyse the direction in which the response capacity of the professionals to face a rebound is evolving.

Design: A cross-sectional study.

Setting: Primary care and hospitals in Spain.

Participants: A non-randomised sample of 685 health professionals (physicians, nurses, and other health staff).

Primary and secondary outcome measures: Frequency of stress responses (EASE Scale) in global terms and by factors (affective response and fears and anxiety), the intensity of stress responses (emotional adjustment, mild levels of emotional distress, medium-high emotional overload and extreme acute stress), and variation of stress responses according to the number of deaths per day per territory and the evolutionary stage of the COVID-19 pandemic.

Results: The average global score on the EASE scale was 11.1 (SD 6.7) out of 30. Among the health professionals surveyed, 44.2% presented a good emotional adjustment, 27.4% an affordable level of emotional distress, 23.9% medium-high emotional overload, and 4.5% extreme acute stress. Three hundred and forty-one (49.8%) had difficulty disconnecting from work and 49% were afraid of infecting their family. The stress responses were slightly more intense in the most affected territories ( $p=0.003$ ) and during the restoration phase ( $p=0.000$ ) where, despite the improvement of the situation, the response could be determined by accumulated stress and fatigue.

1  
2  
3 Conclusions: The pandemic has affected the well-being of health professionals and has  
4  
5 reduced their resilience in the face of possible rebounds. The institutional approach to  
6  
7 the psychological and emotional needs of health professionals is essential to ensure  
8  
9 patient safety, quality of care, and eventually the system's ability to respond effectively  
10  
11 to possible future crises of similar magnitude.  
12  
13  
14  
15  
16  
17  
18

### 19 **Strengths and limitations of this study**

- 21 • This is an observational study to determine the volume of health professionals  
22 who present a high level of acute stress due to their care of patients with COVID-  
23 19 that may prevent them from carrying out their functions and to analyse the  
24 direction in which the response capacity of the professionals to face a rebound is  
25 evolving.  
26  
27
- 28 • This study used a scale specifically designed to assess acute stress of health  
29 professionals in direct contact with patients with COVID-19 (EASE Scale). This  
30 scale was previously validated  
31  
32
- 33 • The study was conducted in Spain between March 18 and May 17, 2020,  
34 coinciding with the phase of greatest acceleration and subsequent flattening of  
35 the curve of the pandemic. In this study, it has been shown how the impact of the  
36 first outbreak has left the workforce emotionally drained, which could limit their  
37 ability to adequately play their role in the face of a possible outbreak  
38  
39
- 40 • This study was based on a non-randomised sample of professionals. The scale  
41 may have reached different sectors of the study population unevenly due to the  
42 media used  
43  
44  
45  
46  
47  
48  
49  
50  
51  
52  
53  
54  
55  
56  
57  
58  
59  
60

- Socio-demographic data were not collected from health professionals to preserve the privacy of the responses; this has made it impossible to make comparisons between groups at different times

**Funding:** This research received no specific grant from any funding agency in the public, commercial or not-for-profit sectors.

**Competing interests:** None declared.

**Contributors:** JJM conceived and designed the work. JJM, IC, MG and MVPJ designed the scale. MAV and CF developed the web and mobile app for the online administration of the scale. JMD was responsible for the recruitment of participants. AM performed the statistical analysis. IC and MG wrote a first draft of the manuscript, which was critically reviewed for important intellectual content by JJM and JMD. All authors reviewed the draft and approved the final version of the manuscript.

**Data sharing statement:** Data are available upon reasonable request.

**Ethical approval:** The need for ethics approval for this research is not applicable according to Spanish regulations. The study protocol was approved by the Research Committee of the San Juan University Hospital in Alicante (8th of April 2020).



## Introduction

As of June, the 22nd, COVID-19 pandemic has caused more than 461,274 deaths worldwide, 28,324 in Spain.[1] The number of professionals suffering from COVID-19 is substantial. In Spain, it accounts for 21% of the total number of people infected.[2]

Although the incidence of the pandemic has expanded differently in different geographical areas of each country, most hospitals and health centres around the world have had to reorganise themselves to prioritise the care of COVID-19 patients, breaking with their usual work dynamics. In addition to this cause of work-related stress, there has been uncertainty in decision-making and a lack of resources to adequately treat patients and protect against possible contagion.[3-4] These circumstances have posed an additional risk to patient safety,[5] which may have adversely affected the quality of health care.[6]

The intensity of compassionate fatigue,[7] post-traumatic stress[8-9] and moral injury[10-11] observed among professionals can be expected to depend on the intensity of the spread of the pandemic, the resources available, and individual differences in stress response.

Results of studies quantifying the magnitude of the impact of COVID-19 patient care on the mental health of healthcare professionals have been published since the beginning of the pandemic. These findings have varied widely due to the heterogeneity of the methodologies and instruments used.[12]

In the first studies, carried out at the beginning of February, 71.5% of healthcare personnel, mostly from the province of Hubei in China, presented emotional discomfort,[13] with frequent depressive symptoms (55.7%), anxiety responses

1  
2  
3 (44.7%)[14] and insomnia (78,4%).[15] In Italy, in the days before the peak of infections  
4  
5 (end of March), 49.4% of health professionals reported symptoms of post-traumatic  
6  
7 stress.[16] In Ecuador, in the second half of April, 90% of the medical and nursing staff  
8  
9 already presented moderate-severe burnout levels.[17] In Spain, after the first wave of  
10  
11 hospital care (April-May), 79.5% and 51.1% of health professionals presented symptoms  
12  
13 of anxiety and depression, respectively.[18] The expansion of the pandemic in each  
14  
15 territory has determined the magnitude of the emotional response. In China, sleep  
16  
17 disorders and psychological symptoms were more frequent among medical staff in  
18  
19 Wuhan than among staff in Ningbo.[19]

20  
21  
22  
23  
24  
25 The magnitude and exceptionality of the situation justify these results. The experience  
26  
27 of the crisis affects the entire staff and all professional levels, including support staff in  
28  
29 healthcare (IT, suppliers, janitors, etc.). The opposite would be difficult to explain.  
30  
31 However, the most important question is not the number of professionals who have been  
32  
33 emotionally affected as a result of their assistance services, a circumstance that has  
34  
35 been aggravated by this crisis but is inherent to the work they do, but rather how many  
36  
37 have not managed to recover, how their resilience is evolving or to what extent they can  
38  
39 deal with a possible new outbreak.  
40  
41  
42  
43  
44

45  
46 Most studies have analysed the emotional responses in a short period (approximately  
47  
48 one week) coinciding with a specific stage of the crisis. However, studies on community  
49  
50 coping with catastrophic situations have described that the psychological response  
51  
52 evolves resulting in: impact phase, heroic (intensification of efforts), honeymoon  
53  
54 (optimism), disillusionment (fatigue) and reconstruction (recovery pre-crisis levels).[20]  
55  
56 Therefore, it is expected that the effects of the pandemic on the psychological and  
57  
58 emotional well-being of health professionals will vary as the pandemic evolves and affect  
59  
60

1  
2  
3 their resilience to a new outbreak. At the moment, there are no known studies that have  
4  
5 addressed the problem from this perspective.  
6  
7

8  
9 The objectives of this study were, first, to determine the volume of health professionals  
10  
11 who, because they cared patients with COVID-19, experienced an excessive level of  
12  
13 acute stress that prevented them from performing their role. Second, to analyse the  
14  
15 direction in which the resilience of professionals evolves to face a new outbreak  
16  
17 considering the variation in the frequency and intensity of their stress reactions in the  
18  
19 different phases of the pandemic.  
20  
21  
22  
23  
24  
25

## 26 **Methods**

27  
28  
29 A cross-sectional observational study in a non-randomised sample of healthcare  
30  
31 professionals. The study was conducted in Spain between March 18 and May 17, 2020,  
32  
33 coinciding with the phase of greatest acceleration and subsequent flattening of the curve  
34  
35 of the pandemic. The study protocol was approved by the Research Committee of the  
36  
37 San Juan University Hospital in Alicante (8th of April 2020).  
38  
39  
40

### 41 *Variables and instrument*

42  
43  
44 We used a scale specifically designed to assess acute stress of health professionals in  
45  
46 direct contact with patients with COVID-19 (EASE Scale). This scale was previously  
47  
48 validated.[21] The instrument is composed of 10 items to which responses are given  
49  
50 using a 4-level Likert type scale (0 = It is not happening to me, 1 = It happens to me in  
51  
52 concrete situations, 2 = It often happens to me and 3 = I am like this all the time). The  
53  
54 total score on the scale can range from 0 to 30 points, with greater scores being  
55  
56 interpreted as higher levels of stress. The items are grouped into two factors that  
57  
58  
59  
60

1  
2  
3 evaluate: affective response and fears and anxiety. Factor 1, referring to the affective  
4 response, is composed of 6 items, so that the direct score on this factor ranges from 0  
5  
6 to 18 points. The factor 2 that evaluates fears and anxiety is composed of 4 items and  
7  
8 its minimum and maximum possible scores are 0 and 12 respectively.  
9  
10  
11

### 12 13 *Participants*

14  
15  
16 Healthcare professionals from primary care centres and hospitals. We determined a  
17  
18 minimum sample size of 650 professionals, considering a population of 392,667 health  
19  
20 professionals (hospitals and primary care)[22], an effect size of 0.20, a statistical power  
21  
22 of 95% and a confidence level of 95%.  
23  
24  
25

### 26 27 *Patient and Public Involvement*

28  
29 Patients or the public were not involved in any phase of this study.  
30  
31

### 32 33 *Procedure*

34  
35 The diffusion of the scale and data gathering was done in a twofold way. First, the scale  
36  
37 was made accessible through a web-based resource repository created by the authors  
38  
39 to reduce the impact of the SARS-CoV-2 pandemic on the psychological well-being of  
40  
41 healthcare professionals.[23] These resources to cope with acute stress during the worst  
42  
43 moments of the pandemic were disseminated through several Spanish scientific  
44  
45 societies, social media, and specialized press news. Second, the scale was accessible  
46  
47 through the mobile application BE+ against COVID[24-25] which was disseminated using  
48  
49 the same means and by leaders of occupational health and hospital patient safety units.  
50  
51  
52 The scores on the scale were grouped into 4 ranges. Scores from 0 to 9 points denoted  
53  
54 a good emotional adjustment, 10 to 14 points affordable level of emotional distress, 15  
55  
56 to 24 points medium-high emotional overload, and scores equal to or higher than 25  
57  
58  
59  
60

1  
2  
3 points an acute-extreme stress level. The latter range, with scores above 25, was  
4  
5 considered the level of stress with the potential to limit the professional's optimal  
6  
7 performance of his/her function or work activity.  
8  
9

10  
11 The results of the self-assessment using this scale were linked to the data on the  
12  
13 evolution of the pandemic in Spain, considering both the differences in impact between  
14  
15 territories and the temporal phases of its evolution.  
16  
17

18  
19 In the first case, to determine the territories most and least affected by the pandemic on  
20  
21 May 17th, 2020, the country was divided into two groups according to the number of  
22  
23 deaths from COVID-19. The first group included Madrid, and Catalonia, with more than  
24  
25 5,000 deaths. The second group included Asturias, the Balearic Islands, the Canary  
26  
27 Islands, Cantabria, Extremadura, La Rioja, Murcia, and Navarre with less than 500  
28  
29 deaths. For comparison purposes, a total of 336 participants working in the health  
30  
31 institutions of these territories were included in the analyses.  
32  
33

34  
35  
36 In the second case, to analyse acute stress during the pandemic, four moments of the  
37  
38 evolution of the outbreak were determined according to the number of deaths per day:  
39  
40 less than 500 (03/18 - 03/25), between 600 and 900 (03/28 - 04/15), between 300 and  
41  
42 600 (04/16 - 04/26) and less than 300 (04/27 - 05/17). The periods described  
43  
44 corresponded to the phases of the community's psychological response to the pandemic:  
45  
46 impact (awareness of the problem, less than 500 deaths/day), heroic (increased efforts  
47  
48 to cope with the crisis and mitigate the impact, between 600 and 900 deaths/day),  
49  
50 honeymoon (hope, between 300 and 600 deaths/day) and restoration (progressive  
51  
52 return to calm, less than 300 deaths/day).  
53  
54  
55  
56  
57

### 58 *Statistical analysis*

59  
60

1  
2  
3 Descriptive and frequency analyses were performed. Mean scores on each factor were  
4 transformed to a 0-10 scale to allow comparison because the number of items was  
5 different on each factor. The Kruskal Wallis test and the Mann-Whitney U test were used  
6 to determine the differences in acute stress reactions according to the time of evolution  
7 of the pandemic and the degree to which the territory was affected, respectively. The  
8 confidence interval used was 95%. Data coding and analysis was performed using IBM  
9 SPSS Statistics software, version 25.  
10  
11  
12  
13  
14  
15  
16  
17  
18  
19  
20  
21  
22

## 23 **Results**

24  
25  
26 A total of 685 professionals responded. Of these, 28.6% were doctors, 39% were nurses  
27 and 32.3% were other healthcare staff. 40.4% worked in areas where the pandemic had  
28 had a greater impact. Most of them worked in Madrid (37%), Valencia (15.7%), Andalusia  
29 (14.1%) and Catalonia (3.3%).  
30  
31  
32  
33  
34

### 35 *Scores on the EASE scale*

36  
37  
38 The total score on the scale was 11.1 points (SD 6.7, 95% CI 10.6 - 11.6, range 0-30),  
39 with 44.2% (303) within a good level of emotional adjustment, 27.3% (187) with an  
40 affordable level of emotional distress, 23.9% (164) with a medium-high level of emotional  
41 overload, and 4.5% (31) showing an extreme level of acute stress. Scores between the  
42 emotional response factor vs. the fear/anxiety factor no differences were observed, 3.6  
43 (SD 2.4) vs. 3.8 (SD=2.5);  $p=0.2$  (score transformed into a scale of 0 to 10 points).  
44  
45  
46  
47  
48  
49  
50  
51  
52

53  
54 Three hundred and forty-one (49.8%) of the health professionals highlighted that they  
55 had difficulties in being able to disconnect from work and 49% (335) expressed fear of  
56 infecting their family once they returned home at the end of the working day. 23% (157)  
57  
58  
59  
60

1  
2  
3 expressed concerns about not falling ill and 17% (116) experienced difficulties in  
4  
5 empathizing with the suffering of the patients (Table 1).  
6  
7

#### 8 *EASE scale scores in territories with a higher incidence rate*

9

10  
11 The average score on the EASE scale was higher (up to 30% more) in those territories  
12  
13 with a higher number of recorded deaths compared to those territories that had a lower  
14  
15 number (12.1 vs 9.3  $p=0.003$ ) (Table 2). Even though of the different affectation between  
16  
17 territories, there were aspects in which these differences were not observed, such as  
18  
19 completely losing the taste for things that previously produced tranquillity or well-being  
20  
21 (p=0.50), feeling that people who required the help of the professional were being  
22  
23 neglected (p=0.37), feeling emotionally blocked (p=0.37) or having difficulties in  
24  
25 empathizing with the patients' suffering (p=0.93).  
26  
27  
28  
29

#### 30 31 *EASE scale scores according to the evolution of the pandemic and the different phases* 32 33 *of psychological response to the disaster* 34

35  
36 The average scores on the EASE scale were higher in the restoration phase (April 27-  
37  
38 May 17, 2020) compared to the first period defined as the impact or awareness phase  
39  
40 (March 18-March 25, 2020) (12.7 vs 8.5  $p<0.0001$ ) (Table 3).  
41  
42  
43  
44  
45  
46

## 47 **Discussion**

48

49  
50 This research confirms the impact of the pandemic on the well-being of healthcare  
51  
52 professionals. The level of acute stress experienced by professionals is higher as the  
53  
54 damage from COVID-19 increases in patients. As expected, acute stress has been  
55  
56 higher in those territories where the pandemic has had a greater impact in terms of the  
57  
58 incidence of COVID-19 cases and deaths from this disease.  
59  
60

1  
2  
3 Those professionals working in territories where the pandemic has been particularly  
4 aggressive show more intense emotional responses in those elements related to  
5  
6 thoughts, fears, and physiological reactions because of the situation they are living. This  
7  
8 result has not been observed with the fact of being emotionally blocked to think and take  
9  
10 decisions or with the difficulty to empathize with the suffering of patients, responses  
11  
12 related to this matter could be developed afterward.[26]  
13  
14  
15  
16

17  
18 Acute stress was manifested mainly by the inability to disconnect from work and the fear  
19  
20 of infecting loved ones. Losing empathy for the suffering of patients and fear of becoming  
21  
22 ill are the variables that probably best discriminate against professionals whose condition  
23  
24 prevents them from continuing with their care work.  
25  
26  
27

28 The evolution observed in the stress response of professionals is largely in line with the  
29  
30 phases proposed by the psychological disaster response model.[20] The level of acute  
31  
32 stress manifested by professionals in the restoration phase is greater than the stress  
33  
34 experienced during the impact phase. This result indicates that the capacity to deal with  
35  
36 a new outbreak will be diminished if there is not enough time between outbreaks to allow  
37  
38 for recovery or if decisive action is not taken to recover.  
39  
40  
41

42  
43 This study used a scale specifically designed to discriminate between situations that  
44  
45 cause acute stress in the course of caring for COVID-19 patients, unlike other studies  
46  
47 that used scales to screen for symptoms of anxiety and depression.[13, 27-28] This scale  
48  
49 was based on the premise that the response to the consequences of the pandemic could  
50  
51 not leave professionals indifferent and that the sources of stress that could disable  
52  
53 professional duties would be quite different from those included in most instruments  
54  
55 designed for other purposes. This differential element must be taken into account when  
56  
57 interpreting the results, given that most of the studies that have so far evaluated the  
58  
59  
60



1  
2  
3 psychological impact of the COVID-19 pandemic on health professionals have used  
4  
5 questionnaires that were validated under different conditions than the current ones. The  
6  
7 EASE scale has been sensitive to these changes, allowing the impact of the pandemic  
8  
9 on health professionals to be assessed[10-11] and it can be expected to be useful for  
10  
11 measuring the effects on emotional response and coping capacity if there is a  
12  
13 resurgence.  
14  
15  
16

17  
18 This scale has reflected, above all, that they were unable to disconnect from work,  
19  
20 experienced irritability, anxiety, fear of infecting their families, and doubts about their  
21  
22 ability to make decisions in clinical practice. However, most of the scores reported by  
23  
24 health professionals were in the first and second range of the scale (mild level of  
25  
26 emotional distress). These data show that most professionals have not experienced,  
27  
28 according to the EASE scale scores, levels of extreme acute stress. This result suggests  
29  
30 that we must differentiate between the emotional impact that can be expected from the  
31  
32 stress of the crisis and that other emotional impact that prevents the responsibilities of  
33  
34 the profession from being carried out with the appropriate guarantees for patients. These  
35  
36 results confirm the existence of emotional discomfort in the staff, identifies in what this  
37  
38 discomfort translates to, and that only 1 out of 20 professionals have been emotionally  
39  
40 overwhelmed and with difficulties in carrying out their work.  
41  
42  
43  
44  
45  
46

47  
48 In the case of a new outbreak or a new epidemic, the data suggest that to determine the  
49  
50 level of impact on the mental health of health professionals, the following should be  
51  
52 considered: the specificity of the instruments used to identify the sources of stress or to  
53  
54 measure acute stress associated with the care of COVID-19 patients, the care pressure  
55  
56 and the outcome of the continuous care of new COVID-19 cases and the evolution of  
57  
58 this pressure over time.  
59  
60

1  
2  
3 The SARS-CoV-2 pandemic has caused an unprecedented health crisis that has shaken  
4 the foundations of health systems around the world, requiring responses that were not  
5 always prepared. One reflection is the number of professionals infected. In Spain, as of  
6 18 June, 52,036 health professionals had contracted the COVID-19 disease, and just  
7 over 13% of those hospitalized required admission to the Intensive Care Unit.[2] This  
8 fact, added to the emotional response to the health crisis, has led to their being identified  
9 as the second victim of SARS-CoV-2.  
10  
11  
12  
13  
14  
15  
16  
17  
18  
19

20 The term "second victim"[29] applied to healthcare personnel has been used over the  
21 last two decades to refer to the emotional distress experienced by healthcare  
22 professionals when they suspect that they have been involved in a safety incident that  
23 has resulted in harm to the patient or when they observe that the patient in their care is  
24 not developing properly and their decisions and actions are being questioned. In the  
25 current scenario, where the healthcare professional has not had the appropriate means  
26 to cure and care for patients, we extend the concept of the second victim to refer to any  
27 healthcare or support professional involved in the care of people affected by COVID-19,  
28 who presents acute stress responses when continuously exposed to an extreme  
29 situation caused by the combination of a series of critical factors, including social alarm,  
30 oversaturation of services, scarcity of resources and the poor evolution of the patients  
31 under their care.  
32  
33  
34  
35  
36  
37  
38  
39  
40  
41  
42  
43  
44  
45  
46  
47  
48  
49

50 The response to the emotional and psychological needs that the staff of health  
51 institutions is experiencing as a result of this situation is justified not only on ethical  
52 grounds but also to ensure quality care and patient safety.[30] Precisely the recovery of  
53 these systems after the COVID-19 crisis that requires restoring the working morale and  
54 welfare of health professionals and strengthening their capacity for resilience.[31] Some  
55  
56  
57  
58  
59  
60

1  
2  
3 authors suggest adopting measures based on the social support provided by co-workers  
4  
5 or peers.[32-33] Digital initiatives have also been developed in the form of broader  
6  
7 programmes that integrate social support as one of their resources to mitigate the impact  
8  
9 of COVID-19 on health professionals.[10, 34]  
10  
11

12  
13 Despite the recent emergence of tools to measure the effects of the pandemic on mental  
14  
15 health and behaviour in the general population,[35-37] there are still no specific  
16  
17 measures designed and validated for evaluation in health professionals. As far as we  
18  
19 are aware, this study is the first to explore the emotional distress caused by the COVID-  
20  
21 19 health crisis and one of the first to use a specifically validated measure for this  
22  
23 purpose.  
24  
25

### 26 27 28 *Limitations*

29  
30 This study was based on a non-randomised sample of professionals. The scale may  
31  
32 have reached different sectors of the study population unevenly due to the media used.  
33  
34 The motivation of respondents and those who chose not to respond could have biased  
35  
36 the sample and therefore the results. The study looked at a small number of  
37  
38 sociodemographic variables with the intention that participants would feel that their  
39  
40 privacy was guaranteed when completing the scale. This decision has limited the  
41  
42 possibilities of comparative analysis of stress responses by groups. It also prevented  
43  
44 intrasubject comparisons at different times of the crisis.  
45  
46  
47  
48  
49

### 50 51 *Conclusion*

52  
53 Over time, we have become more scientifically and technically prepared to deal with  
54  
55 COVID-19 and have learned multiple lessons on how to best deal with this crisis, but the  
56  
57 impact of the first outbreak has left the workforce emotionally drained, which could limit  
58  
59  
60

1  
2  
3 their ability to properly perform their role in the face of a possible outbreak. Consequently,  
4  
5 health institutions in the process of workforce recovery must incorporate measures to  
6  
7 restore the well-being and work morale of healthcare professionals. This study  
8  
9 demonstrates this, confirming that emotional difficulties begin to appear at the end of the  
10  
11 most critical phases of the pandemic.  
12  
13  
14  
15  
16  
17

## 18 19 20 21 22 23 24 25 26 27 28 29 30 31 32 33 34 35 36 37 38 39 40 41 42 43 44 45 46 47 48 49 50 51 52 53 54 55 56 57 58 59 60

### References

1. Corporación Radio y Televisión Española (rtve). El mapa del coronavirus en España: 28.324 muertos y más de 246.500 contagiados [Internet, 06.22.2020]. Available from: <https://www.rtve.es/noticias/20200622/mapa-del-coronavirus-espana/2004681.shtml>
2. Corporación Radio y Televisión Española (rtve). Los profesionales sanitarios contagiados de COVID-19 superan los 52.000, 81 en la última semana [Internet, 06.19.2020]. Available from: <https://www.rtve.es/noticias/20200619/profesionales-sanitarios-contagiados-covid-19-superan-50000/2014047.shtml>
3. Binkley CE, Kemp DS. Ethical Rationing of Personal Protective Equipment to Minimize Moral Residue During the COVID-19 Pandemic. *J Am Coll Surg*. 2020;230:1111-3. doi: 10.1016/j.jamcollsurg.2020.03.031
4. Steinberg E, Balakrishna A, Habboushe J, *et al*. Calculated Decisions: COVID-19 Calculators During Extreme Resource-Limited Situations. *Emerg Med Pract* 2020;22:CD1-5.
5. Hall LH, Johnson J, Watt I, *et al*. Healthcare Staff Wellbeing, Burnout, and Patient Safety: A Systematic Review. *PLoS One* 2016;11:e0159015.

- 1  
2  
3 6. Wallace JE, Lemaire JB, Ghali WA. Physician Wellness: A Missing Quality Indicator.  
4  
5 *Lancet* 2009;**374**:1714:21. doi: 10.1016/S0140-6736(09)61424-0  
6  
7  
8  
9 7. Alharbi J, Jackson D, Usher K. The potential for COVID-19 to contribute to compassion  
10  
11 fatigue in critical care nurses. *J Clin Nurs* 2020 [online ahead of print]. doi:  
12  
13 10.1111/jocn.15314.  
14  
15  
16 8. Restauri N, Sheridan AD. Burnout and Posttraumatic Stress Disorder in the  
17  
18 Coronavirus Disease 2019 (COVID-19) Pandemic: Intersection, Impact, and  
19  
20 Interventions. *J Am Coll Radiol* 2020 [online ahead of print]. doi:  
21  
22 10.1016/j.jacr.2020.05.021  
23  
24  
25  
26 9. Huang JZ, Han MF, Luo TD, *et al.* Mental Health Survey of Medical Staff in a Tertiary  
27  
28 Infectious Disease Hospital for COVID-19. *Zhonghua Lao Dong Wei Sheng Zhi Ye Bing*  
29  
30 *Za Zhi* 2020;**38**:192-5. doi: 10.3760/cma.j.cn121094-20200219-00063  
31  
32  
33  
34 10. Williamson V, Murphy D, Greenberg N. COVID-19 and experiences of moral injury  
35  
36 in front-line key workers. *Occup Med (Lond)* 2020:kqaa052. doi:  
37  
38 10.1093/occmed/kqaa052  
39  
40  
41  
42 11. Williams RD, Brundage JA, Williams EB. Moral Injury in Times of COVID-19. *Health*  
43  
44 *Serv Psychol* 2020:1-5. doi: 10.1007/s42843-020-00011-4  
45  
46  
47  
48 12. Pappa S, Ntella V, Giannakas T, *et al.* Prevalence of depression, anxiety, and  
49  
50 insomnia among healthcare workers during the COVID-19 pandemic: A systematic  
51  
52 review and meta-analysis. *Brain Behav Immun* 2020;S0889-1591(20)30845-X.  
53  
54 doi:10.1016/j.bbi.2020.05.026  
55  
56  
57  
58  
59  
60

1  
2  
3  
4  
5  
6  
7  
8  
9  
10  
11  
12  
13  
14  
15  
16  
17  
18  
19  
20  
21  
22  
23  
24  
25  
26  
27  
28  
29  
30  
31  
32  
33  
34  
35  
36  
37  
38  
39  
40  
41  
42  
43  
44  
45  
46  
47  
48  
49  
50  
51  
52  
53  
54  
55  
56  
57  
58  
59  
60

13. Lai J, Ma S, Wang Y, *et al.* Factors Associated With Mental Health Outcomes Among Health Care Workers Exposed to Coronavirus Disease 2019. *JAMA Netw Open* 2020;**3**:e203976. doi:10.1001/jamanetworkopen.2020.3976

14. Zhang C, Yang L, Liu S, *et al.* Survey of Insomnia and Related Social Psychological Factors Among Medical Staff Involved in the 2019 Novel Coronavirus Disease Outbreak. *Front Psychiatry* 2020;**11**:306. doi: 10.3389/fpsy.2020.00306

15. Qi J, Xu J, Li BZ, *et al.* The evaluation of sleep disturbances for Chinese frontline medical workers under the outbreak of COVID-19. *Sleep Med* 2020;**72**:1-4. doi: 10.1016/j.sleep.2020.05.023

16. Rossi R, Socci V, Pacitti F, *et al.* Mental Health Outcomes Among Frontline and Second-Line Health Care Workers During the Coronavirus Disease 2019 (COVID-19) Pandemic in Italy. *JAMA Netw Open* 2020;**3**:e2010185. doi:10.1001/jamanetworkopen.2020.10185

17. Vinueza Veloz AF, Aldaz Pachacama NR, Mera Segovia CM, *et al.* Síndrome de Burnout en médicos/as y enfermeros/as ecuatorianos durante la pandemia de COVID-19. 2020 pre-print Scielo. Available from: [https://www.google.com/url?sa=t&rct=j&q=&esrc=s&source=web&cd=&ved=2ahUKEwiH8bCK5ZXqAhXTiFwKHftxDmMQFjAAegQIAhAB&url=https%3A%2F%2Fpreprints.scielo.org%2Findex.php%2Fscielo%2Fpreprint%2Fdownload%2F708%2F958%2F988&u sg=AOvVaw3PSHAVyRBM1rCJu6iL\\_xWI](https://www.google.com/url?sa=t&rct=j&q=&esrc=s&source=web&cd=&ved=2ahUKEwiH8bCK5ZXqAhXTiFwKHftxDmMQFjAAegQIAhAB&url=https%3A%2F%2Fpreprints.scielo.org%2Findex.php%2Fscielo%2Fpreprint%2Fdownload%2F708%2F958%2F988&u sg=AOvVaw3PSHAVyRBM1rCJu6iL_xWI)

18. Universidad Autónoma de Madrid. El 79,5% de los sanitarios sufren ansiedad y el 40% se siente emocionalmente agotado tras la primera oleada de atención hospitalaria

1  
2  
3 por Covid-19 [press statement]. Available from: [https://www.ucm.es/file/estres-](https://www.ucm.es/file/estres-sanitarios-mayo-2020)  
4  
5 sanitarios-mayo-2020  
6

7  
8 19. Li X, Yu H, Bian G, *et al.* Prevalence, risk factors, and clinical correlates of insomnia  
9 in volunteer and at home medical staff during the COVID-19. *Brain Behav Immun*  
10 2020;**87**:140-41. doi:10.1016/j.bbi.2020.05.008  
11  
12  
13  
14

15  
16 20. Myers D, Zunin L. Phases of disaster, in DeWolfe D (Ed.), Training Manual for Mental  
17 Health and Human Service Workers in Major Disasters. Washington, DC: US  
18 Government Printing Office; 2000.  
19  
20  
21  
22

23  
24 21. Mira JJ, Cobos-Vargas A, Martínez-García O, *et al.* The Acute Stress Scale in  
25 healthcare professionals caring for patients with COVID-19. Validation study. [pending  
26 publication]  
27  
28  
29  
30

31  
32 22. Ministerio de Sanidad, Consumo y Bienestar Social. Portal Estadístico, Área de  
33 Inteligencia de Gestión. Consulta Interactiva del Sistema Nacional de Salud [Internet].  
34 2018. Available from:  
35 [https://pestadistico.inteligenciadegestion.mscbs.es/publicoSNS/Comun/DefaultPublico.](https://pestadistico.inteligenciadegestion.mscbs.es/publicoSNS/Comun/DefaultPublico.aspx)  
36  
37  
38  
39  
40  
41  
42  
43

44 23. SARS-CoV-2 Second Victim Study Group. BE+ against COVID. SARS-CoV-2  
45 (COVID-19) second victims [Internet]. Available from:  
46 <https://secondvictimscovid19.umh.es/p/resource-09.html>  
47  
48  
49  
50

51  
52 24. BE+ against COVID, Google Play [Internet, mobile app]. Available from:  
53 <https://play.google.com/store/apps/details?id=com.appandabout.defusing>  
54  
55

56  
57 25. BE+ against COVID, App Store [Internet, mobile app]. Available from:  
58 <https://apps.apple.com/es/app/ser-positivo-contra-covid/id1512478131>  
59  
60

- 1  
2  
3 26. Kadhum M, Farrell S, Hussain R, *et al.* Mental wellbeing in surgical trainees:  
4 implications for the post-COVID-19 era. *Br J Surg* 2020;**107**:e264. doi:  
5  
6 10.1002/bjs.11726  
7  
8  
9  
10  
11 27. Liu CY, Yang YZ, Zhang XM, *et al.* The prevalence and influencing factors in anxiety  
12 in medical workers fighting COVID-19 in China: a cross-sectional survey. *Epidemiol*  
13  
14 *Infect* 2020;**148**:e98. doi:10.1017/S0950268820001107  
15  
16  
17  
18 28. Wu Y, Wang J, Luo C, *et al.* A Comparison of Burnout Frequency Among Oncology  
19 Physicians and Nurses Working on the Frontline and Usual Wards During the COVID-  
20  
21 19 Epidemic in Wuhan, China. *J Pain Symptom Manage* 2020;**60**:e60-5.  
22  
23 doi:10.1016/j.jpainsymman.2020.04.008  
24  
25  
26  
27  
28 29. Wu AW. Medical error: the second victim. The doctor who makes the mistake needs  
29 help too. *BMJ* 2000;**320**:726-27. doi: 10.1136/bmj.320.7237.726  
30  
31  
32  
33  
34 30. Grant S, Davidson K, Manages K, *et al.* Creating Healthful Work Environments to  
35 Deliver on the Quadruple Aim: A Call to Action. *J Nurs Adm* 2020;**50**:314-21. doi:  
36  
37 10.1097/NNA.0000000000000891  
38  
39  
40  
41 31. Rangachari P, Woods J. Preserving Organizational Resilience, Patient Safety, and  
42 Staff Retention during COVID-19 Requires a Holistic Consideration of the Psychological  
43  
44 Safety of Healthcare Workers. *Int J Environ Res Public Health* 2020;**17**:E1267. doi:  
45  
46 10.3390/ijerph17124267  
47  
48  
49  
50 32. Wu AW, Connors C, Everly Jr GS. COVID-19: Peer Support and Crisis  
51  
52 Communication Strategies to Promote Institutional Resilience. *Ann Intern Med* 2020;  
53  
54 M20-1236. doi: 10.7326/M20-1236  
55  
56  
57  
58  
59  
60



- 1  
2  
3  
4 33. Albott CS, Wozniak JR, McGlinch BP, *et al.* Battle Buddies: Rapid Deployment of a  
5  
6 Psychological Resilience Intervention for Health Care Workers During the COVID-19  
7  
8 Pandemic. *Anesth Analg* 2020;**131**:43-54. doi:10.1213/ANE.0000000000004912  
9  
10  
11 34. Blake H, Bermingham F, Johson G, *et al.* Mitigating the Psychological Impact of  
12  
13 COVID-19 on Healthcare Workers: A Digital Learning Package. *Int J Environ Res Public*  
14  
15 *Health*. 2020;**17**:2997. doi: 10.3390/ijerph17092997  
16  
17  
18 35. Ahorsu DK, Lin CY, Imani V, *et al.* The Fear of COVID-19 Scale: Development and  
19  
20 Initial Validation. *Int J Ment Health Addict* 2020;1-9. doi:10.1007/s11469-020-00270-8  
21  
22  
23  
24 36. Chandu VC, Pachava S, Vadapalli V, *et al.* Development and Initial Validation of the  
25  
26 COVID-19 Anxiety Scale. *Indian J Public Health* 2020;**64**:S201-04.  
27  
28 doi:10.4103/ijph.IJPH\_492\_20  
29  
30  
31 37. Taylor S, Landry CA, Paluszek MM, *et al.* Development and initial validation of the  
32  
33 COVID Stress Scales. *J Anxiety Disord* 2020;**72**:102232.  
34  
35  
36  
37 doi:10.1016/j.janxdis.2020.102232  
38  
39  
40  
41  
42  
43  
44  
45  
46  
47  
48  
49  
50  
51  
52  
53  
54  
55  
56  
57  
58  
59  
60

Table 1. EASE Scores on the COVID-19 Acute Stress in Care Scale

|                                                                                                                                          | Mean (IC<br>95%)   | SD  | It often<br>happens to me<br>(%) | I am like this<br>all the time (%) |
|------------------------------------------------------------------------------------------------------------------------------------------|--------------------|-----|----------------------------------|------------------------------------|
| I can't help but think of recent critical situations. I can't get out of work.                                                           | 1.5 (1.4 – 1.6)    | 1.0 | 33.4                             | 16.4                               |
| I have completely lost the taste for things that gave me peace of mind.                                                                  | 1.1 (1.0 – 1.2)    | 0.9 | 25.5                             | 8.0                                |
| I keep my distance, I resent dealing with people, I'm irascible even at home.                                                            | 1.3 (1.2 – 1.4)    | 1.0 | 24.4                             | 12.8                               |
| I feel that I am neglecting many people who need my help.                                                                                | 1.0 (0.9 – 1.1)    | 1.0 | 21.5                             | 9.2                                |
| I have difficulty thinking and making decisions, I have many doubts, I have entered a kind of emotional blockage.                        | 1.1 (1.0 – 1.1)    | 1.0 | 23.1                             | 8.9                                |
| I feel intense physiological reactions (shocks, sweating, dizziness, shortness of breath, insomnia, etc.) related to the current crisis. | 1.2 (1.1 – 1.3)    | 1.0 | 25.5                             | 11.2                               |
| I feel on permanent alert. I believe that my reactions now put other patients, my colleagues, or myself at risk.                         | 1.0 (0.9 – 1.1)    | 1.0 | 20.7                             | 9.9                                |
| Worrying about not getting sick causes me a strain that's hard to bear.                                                                  | 0.9 (0.8 – 1.0)    | 0.9 | 16.4                             | 7.6                                |
| I'm afraid I'm going to infect my family.                                                                                                | 1.5 (1.4 – 1.6)    | 1.0 | 28.2                             | 20.7                               |
| I have difficulty empathizing with patients' suffering or connecting with their situation (emotional distancing, emotional anaesthesia). | 0.6 (0.5 – 0.7)    | 0.9 | 11.7                             | 5.8                                |
| Total score                                                                                                                              | 11.1 (10.6 – 11.6) | 6.7 | 23.9                             | 4.5                                |

---

|          |                    |     |
|----------|--------------------|-----|
| Factor 1 | 3.6 (3.4 –<br>3.8) | 2.4 |
| Factor 2 | 3.8 (3.6 –<br>4.0) | 2.5 |

---

N=685

Scores from 0 to 3 points on each of the items on the scale

Scores from 0 to 30 in total on the scale

Score transformed from 0 to 10 points by a factor of 1

Score transformed from 0 to 10 points in factor 2

Mean difference between factors p=0.2

Table 2. Mean difference on EASE Scale between territories most and least affected by the SARS-CoV-2 pandemic

|                                                                                                                                          | Most affected territories <sup>a</sup> | Least affected territories <sup>b</sup> | p     |
|------------------------------------------------------------------------------------------------------------------------------------------|----------------------------------------|-----------------------------------------|-------|
| I can't help but think of recent critical situations. I can't get out of work.                                                           | 1.6                                    | 1.4                                     | 0.06  |
| I have completely lost the taste for things that gave me peace of mind.                                                                  | 1.1                                    | 1.1                                     | 0.50  |
| I keep my distance, I resent dealing with people, I'm irascible even at home.                                                            | 1.4                                    | 1.1                                     | 0.004 |
| I feel that I am neglecting many people who need my help.                                                                                | 1.1                                    | 0.9                                     | 0.12  |
| I have difficulty thinking and making decisions, I have many doubts, I have entered a kind of emotional blockage.                        | 1.2                                    | 1.0                                     | 0.37  |
| I feel intense physiological reactions (shocks, sweating, dizziness, shortness of breath, insomnia, etc.) related to the current crisis. | 1.3                                    | 0.8                                     | 0.00  |
| I feel on permanent alert. I believe that my reactions now put other patients, my colleagues, or myself at risk.                         | 1.1                                    | 0.7                                     | 0.02  |
| Worrying about not getting sick causes me a strain that's hard to bear.                                                                  | 1.0                                    | 0.6                                     | 0.004 |
| I'm afraid I'm going to infect my family.                                                                                                | 1.7                                    | 1.3                                     | 0.004 |
| I have difficulty empathizing with patients' suffering or connecting with their situation (emotional distancing, emotional anaesthesia). | 0.7                                    | 0.6                                     | 0.93  |
| Total score                                                                                                                              | 12.1                                   | 9.3                                     | 0.003 |
| Factor 1                                                                                                                                 | 3.9                                    | 3.3                                     | 0.09  |
| Factor 2                                                                                                                                 | 4.2                                    | 2.8                                     | 0.00  |

N=336

Scores from 0 to 3 points on each of the items on the scale

Scores from 0 to 30 in total on the scale

Score transformed from 0 to 10 points by a factor of 1

Score transformed from 0 to 10 points in factor 2

<sup>a</sup> Madrid y Cataluña (more than 5000 deaths by May the 17<sup>th</sup> 2020)

---

<sup>b</sup> Asturias, Baleares, Canarias, Cantabria, Extremadura, La Rioja, Murcia y Navarra (less than 500 deaths by May the 17<sup>th</sup> 2020)

For peer review only

1  
2  
3  
4  
5  
6  
7  
8  
9  
10  
11  
12  
13  
14  
15  
16  
17  
18  
19  
20  
21  
22  
23  
24  
25  
26  
27  
28  
29  
30  
31  
32  
33  
34  
35  
36  
37  
38  
39  
40  
41  
42  
43  
44  
45  
46  
47  
48  
49  
50  
51  
52  
53  
54  
55  
56  
57  
58  
59  
60

Table 3. Mean difference at four temporal moments of expansion of the SARS-COV-2 pandemic

|                                                                                                                                          | Impact <sup>a</sup> | Heroic <sup>b</sup> | Honeymoon <sup>c</sup> | Reconstruction <sup>d</sup> | p      |
|------------------------------------------------------------------------------------------------------------------------------------------|---------------------|---------------------|------------------------|-----------------------------|--------|
| I can't help but think of recent critical situations. I can't get out of work.                                                           | 1.3                 | 1.4                 | 1.3                    | 1.6                         | <0.001 |
| I have completely lost the taste for things that gave me peace of mind.                                                                  | 0.6                 | 1.0                 | 1.1                    | 1.2                         | <0.001 |
| I keep my distance, I resent dealing with people, I'm irascible even at home.                                                            | 0.5                 | 1.1                 | 1.1                    | 1.5                         | <0.001 |
| I feel that I am neglecting many people who need my help.                                                                                | 0.7                 | 0.9                 | 0.9                    | 1.2                         | 0.01   |
| I have difficulty thinking and making decisions, I have many doubts, I have entered a kind of emotional blockage.                        | 0.8                 | 0.9                 | 0.9                    | 1.3                         | <0.001 |
| I feel intense physiological reactions (shocks, sweating, dizziness, shortness of breath, insomnia, etc.) related to the current crisis. | 0.7                 | 1.0                 | 1.1                    | 1.4                         | <0.001 |
| I feel on permanent alert. I believe that my reactions now put other patients, my colleagues, or myself at risk.                         | 1.0                 | 0.9                 | 0.8                    | 1.2                         | <0.001 |
| Worrying about not getting sick causes me a strain that's hard to bear.                                                                  | 0.9                 | 0.9                 | 0.8                    | 1.0                         | 0,22   |
| I'm afraid I'm going to infect my family.                                                                                                | 1.6                 | 1,3                 | 1,3                    | 1,7                         | <0.001 |
| I have difficulty empathizing with patients' suffering or connecting with their situation                                                | 0.4                 | 0.7                 | 0.5                    | 0.6                         | 0.42   |

|                                                   |     |      |     |      |        |
|---------------------------------------------------|-----|------|-----|------|--------|
| (emotional distancing,<br>emotional anaesthesia). |     |      |     |      |        |
| Total score                                       | 8.5 | 10.2 | 9.8 | 12.7 | <0.001 |
| Factor 1                                          | 2.4 | 3.3  | 3.3 | 4.1  | <0.001 |
| Factor 2                                          | 3.5 | 3.5  | 3.3 | 4.4  | <0.001 |

N=685

Scores from 0 to 3 points on each of the items on the scale

Scores from 0 to 30 in total on the scale

Score transformed from 0 to 10 points by a factor of 1

Score transformed from 0 to 10 points in factor 2

<sup>a</sup> From March 18<sup>th</sup> to March 25<sup>th</sup>, 2020 (less than 500 deaths per day)

<sup>b</sup> From March 28<sup>th</sup> to April 15<sup>th</sup>, 2020 (between 600 - 900 deaths per day)

<sup>c</sup> From April 16<sup>th</sup> to April 26<sup>th</sup>, 2020 (between 300 - 600 deaths per day)

<sup>d</sup> From April 27<sup>th</sup> to May 17<sup>th</sup>, 2020 (less than 300 deaths per day)

STROBE Statement—Checklist of items that should be included in reports of *cross-sectional studies*

|                              | Item No                                                                            | Recommendation                                                                                                                                                                                    | Page No      |
|------------------------------|------------------------------------------------------------------------------------|---------------------------------------------------------------------------------------------------------------------------------------------------------------------------------------------------|--------------|
| <b>Title and abstract</b>    | 1                                                                                  | (a) Indicate the study's design with a commonly used term in the title or the abstract                                                                                                            | 1-2          |
|                              |                                                                                    | (b) Provide in the abstract an informative and balanced summary of what was done and what was found                                                                                               | 2            |
| <b>Introduction</b>          |                                                                                    |                                                                                                                                                                                                   |              |
| Background/rationale         | 2                                                                                  | Explain the scientific background and rationale for the investigation being reported                                                                                                              | 4-5          |
| Objectives                   | 3                                                                                  | State specific objectives, including any prespecified hypotheses                                                                                                                                  | 5            |
| <b>Methods</b>               |                                                                                    |                                                                                                                                                                                                   |              |
| Study design                 | 4                                                                                  | Present key elements of study design early in the paper                                                                                                                                           | 5            |
| Setting                      | 5                                                                                  | Describe the setting, locations, and relevant dates, including periods of recruitment, exposure, follow-up, and data collection                                                                   | 5-6          |
| Participants                 | 6                                                                                  | (a) Give the eligibility criteria, and the sources and methods of selection of participants                                                                                                       | 6            |
| Variables                    | 7                                                                                  | Clearly define all outcomes, exposures, predictors, potential confounders, and effect modifiers. Give diagnostic criteria, if applicable                                                          | 5            |
| Data sources/<br>measurement | 8*                                                                                 | For each variable of interest, give sources of data and details of methods of assessment (measurement). Describe comparability of assessment methods if there is more than one group              | 5            |
| Bias                         | 9                                                                                  | Describe any efforts to address potential sources of bias                                                                                                                                         | -            |
| Study size                   | 10                                                                                 | Explain how the study size was arrived at                                                                                                                                                         | 5, 7         |
| Quantitative variables       | 11                                                                                 | Explain how quantitative variables were handled in the analyses. If applicable, describe which groupings were chosen and why                                                                      | 6-7          |
| Statistical methods          | 12                                                                                 | (a) Describe all statistical methods, including those used to control for confounding                                                                                                             | 7            |
|                              |                                                                                    | (b) Describe any methods used to examine subgroups and interactions                                                                                                                               | 6-7          |
|                              | (c) Explain how missing data were addressed                                        | -                                                                                                                                                                                                 |              |
|                              | (d) If applicable, describe analytical methods taking account of sampling strategy | 6-7                                                                                                                                                                                               |              |
|                              | (e) Describe any sensitivity analyses                                              | -                                                                                                                                                                                                 |              |
| <b>Results</b>               |                                                                                    |                                                                                                                                                                                                   |              |
| Participants                 | 13*                                                                                | (a) Report numbers of individuals at each stage of study—eg numbers potentially eligible, examined for eligibility, confirmed eligible, included in the study, completing follow-up, and analysed | 7            |
|                              |                                                                                    | (b) Give reasons for non-participation at each stage                                                                                                                                              | -            |
|                              |                                                                                    | (c) Consider use of a flow diagram                                                                                                                                                                | -            |
| Descriptive data             | 14*                                                                                | (a) Give characteristics of study participants (eg demographic, clinical, social) and information on exposures and potential confounders                                                          | 7            |
|                              |                                                                                    | (b) Indicate number of participants with missing data for each variable of interest                                                                                                               | -            |
| Outcome data                 | 15*                                                                                | Report numbers of outcome events or summary measures                                                                                                                                              | 7-8<br>15-17 |



1  
2  
3  
4  
5  
6  
7  
8  
9  
10  
11  
12  
13  
14  
15  
16  
17  
18  
19  
20  
21  
22  
23  
24  
25  
26  
27  
28  
29  
30  
31  
32  
33  
34  
35  
36  
37  
38  
39  
40  
41  
42  
43  
44  
45  
46  
47  
48  
49  
50  
51  
52  
53  
54  
55  
56  
57  
58  
59  
60

|                          |    |                                                                                                                                                                                                              |              |
|--------------------------|----|--------------------------------------------------------------------------------------------------------------------------------------------------------------------------------------------------------------|--------------|
| Main results             | 16 | (a) Give unadjusted estimates and, if applicable, confounder-adjusted estimates and their precision (eg, 95% confidence interval). Make clear which confounders were adjusted for and why they were included | 7-8<br>15-17 |
|                          |    | (b) Report category boundaries when continuous variables were categorized                                                                                                                                    | 7-8<br>15    |
|                          |    | (c) If relevant, consider translating estimates of relative risk into absolute risk for a meaningful time period                                                                                             | -            |
| Other analyses           | 17 | Report other analyses done—eg analyses of subgroups and interactions, and sensitivity analyses                                                                                                               | -            |
| <b>Discussion</b>        |    |                                                                                                                                                                                                              |              |
| Key results              | 18 | Summarise key results with reference to study objectives                                                                                                                                                     | 9            |
| Limitations              | 19 | Discuss limitations of the study, taking into account sources of potential bias or imprecision. Discuss both direction and magnitude of any potential bias                                                   | 10-11        |
| Interpretation           | 20 | Give a cautious overall interpretation of results considering objectives, limitations, multiplicity of analyses, results from similar studies, and other relevant evidence                                   | 9-10         |
| Generalisability         | 21 | Discuss the generalisability (external validity) of the study results                                                                                                                                        | 10-11        |
| <b>Other information</b> |    |                                                                                                                                                                                                              |              |
| Funding                  | 22 | Give the source of funding and the role of the funders for the present study and, if applicable, for the original study on which the present article is based                                                | 3            |

\*Give information separately for exposed and unexposed groups.

**Note:** An Explanation and Elaboration article discusses each checklist item and gives methodological background and published examples of transparent reporting. The STROBE checklist is best used in conjunction with this article (freely available on the Web sites of PLoS Medicine at <http://www.plosmedicine.org/>, Annals of Internal Medicine at <http://www.annals.org/>, and Epidemiology at <http://www.epidem.com/>). Information on the STROBE Initiative is available at [www.strobe-statement.org](http://www.strobe-statement.org).

# BMJ Open

## Acute Stress of the Healthcare Workforce during the COVID-19 pandemic evolution. A cross-sectional study in Spain

|                                 |                                                                                                                                                                                                                                                                                                                                                                                                                                                                                                                                                                                                                                                                                                                                                                                                                                                |
|---------------------------------|------------------------------------------------------------------------------------------------------------------------------------------------------------------------------------------------------------------------------------------------------------------------------------------------------------------------------------------------------------------------------------------------------------------------------------------------------------------------------------------------------------------------------------------------------------------------------------------------------------------------------------------------------------------------------------------------------------------------------------------------------------------------------------------------------------------------------------------------|
| Journal:                        | <i>BMJ Open</i>                                                                                                                                                                                                                                                                                                                                                                                                                                                                                                                                                                                                                                                                                                                                                                                                                                |
| Manuscript ID                   | bmjopen-2020-042555.R1                                                                                                                                                                                                                                                                                                                                                                                                                                                                                                                                                                                                                                                                                                                                                                                                                         |
| Article Type:                   | Original research                                                                                                                                                                                                                                                                                                                                                                                                                                                                                                                                                                                                                                                                                                                                                                                                                              |
| Date Submitted by the Author:   | 31-Aug-2020                                                                                                                                                                                                                                                                                                                                                                                                                                                                                                                                                                                                                                                                                                                                                                                                                                    |
| Complete List of Authors:       | Mira, José ; Miguel Hernandez University of Elche, Health Psychology; Alicante-Sant Joan Health District, Carrillo, Irene; Miguel Hernandez University of Elche, Health Psychology; FISABIO, Guilbert, Mercedes; Miguel Hernandez University of Elche, Health Psychology<br>Mula, Aurora; Foundation for the Promotion of Health and Biomedical Research of Valencia Region (FISABIO)<br>Martin, Jimmy; Foundation for the Promotion of Health and Biomedical Research of Valencia Region (FISABIO)<br>Pérez-Jover, M <sup>a</sup> Virtudes; Miguel Hernandez University of Elche, Health Psychology<br>Vicente, M <sup>a</sup> Asunción ; Miguel Hernandez University of Elche, Department of Systems Engineering and Automation<br>Fernández , César; Miguel Hernandez University of Elche, Department of Systems Engineering and Automation |
| <b>Primary Subject Heading</b>: | Health services research                                                                                                                                                                                                                                                                                                                                                                                                                                                                                                                                                                                                                                                                                                                                                                                                                       |
| Secondary Subject Heading:      | Mental health, Public health, Occupational and environmental medicine, Health policy                                                                                                                                                                                                                                                                                                                                                                                                                                                                                                                                                                                                                                                                                                                                                           |
| Keywords:                       | Health policy < HEALTH SERVICES ADMINISTRATION & MANAGEMENT, Organisation of health services < HEALTH SERVICES ADMINISTRATION & MANAGEMENT, Quality in health care < HEALTH SERVICES ADMINISTRATION & MANAGEMENT, Anxiety disorders < PSYCHIATRY, Depression & mood disorders < PSYCHIATRY, PUBLIC HEALTH                                                                                                                                                                                                                                                                                                                                                                                                                                                                                                                                      |
|                                 |                                                                                                                                                                                                                                                                                                                                                                                                                                                                                                                                                                                                                                                                                                                                                                                                                                                |

SCHOLARONE™  
Manuscripts



I, the Submitting Author has the right to grant and does grant on behalf of all authors of the Work (as defined in the below author licence), an exclusive licence and/or a non-exclusive licence for contributions from authors who are: i) UK Crown employees; ii) where BMJ has agreed a CC-BY licence shall apply, and/or iii) in accordance with the terms applicable for US Federal Government officers or employees acting as part of their official duties; on a worldwide, perpetual, irrevocable, royalty-free basis to BMJ Publishing Group Ltd ("BMJ") its licensees and where the relevant Journal is co-owned by BMJ to the co-owners of the Journal, to publish the Work in this journal and any other BMJ products and to exploit all rights, as set out in our [licence](#).

The Submitting Author accepts and understands that any supply made under these terms is made by BMJ to the Submitting Author unless you are acting as an employee on behalf of your employer or a postgraduate student of an affiliated institution which is paying any applicable article publishing charge ("APC") for Open Access articles. Where the Submitting Author wishes to make the Work available on an Open Access basis (and intends to pay the relevant APC), the terms of reuse of such Open Access shall be governed by a Creative Commons licence – details of these licences and which [Creative Commons](#) licence will apply to this Work are set out in our licence referred to above.

Other than as permitted in any relevant BMJ Author's Self Archiving Policies, I confirm this Work has not been accepted for publication elsewhere, is not being considered for publication elsewhere and does not duplicate material already published. I confirm all authors consent to publication of this Work and authorise the granting of this licence.

1  
2  
3  
4  
5  
6  
7 **Acute Stress of the Healthcare Workforce during the COVID-19 pandemic evolution. A**  
8  
9 **cross-sectional study in Spain**  
10

11 José Joaquín Mira<sup>1,2\*</sup>, Irene Carrillo<sup>2,3</sup>, Mercedes Guilabert<sup>2</sup>, Aurora Mula<sup>3</sup>, Jimmy Martin-  
12  
13 Delgado<sup>3</sup>, María Virtudes Pérez-Pérez<sup>2</sup>, María Asunción Vicente<sup>4</sup>, César Fernández<sup>4</sup> on  
14  
15 behalf of SARS-CoV-2 Second Victim Study Group†  
16  
17

18  
19  
20 \* **Corresponding author:** José Joaquín Mira; Postal address: Avenida de la Universidad,  
21  
22 s/n, 03202 Elche, Alicante (Spain); e-mail: jose.mira@umh.es; Telephone: +34  
23  
24 966658984  
25

26  
27  
28 <sup>1</sup> Alicante-Sant Joan Health District, Alicante, Spain.  
29

30  
31 <sup>2</sup> Department of Health Psychology, Miguel Hernández University, Elche, Spain.  
32

33  
34 <sup>3</sup> Foundation for the Promotion of Health and Biomedical Research of Valencia Region  
35  
36 (FISABIO), San Juan de Alicante, Spain.  
37

38  
39 <sup>4</sup> Department of Systems Engineering and Automation, Miguel Hernández University,  
40  
41 Elche, Spain.  
42

43  
44 † SARS-CoV-2 Second Victim Study Group: Ángel Cobos-Vargas, Olga Beatriz  
45  
46 Martínez-García (Hospital Universitario Clínico San Cecilio de Granada, Andalucía,  
47  
48 Spain), M<sup>a</sup> José Bueno-Domínguez (Grup SAGESSA, Reus, Spain), María Pilar Astier-  
49  
50 Peña (Centro de Salud “La Jota”, Zaragoza, Spain), Pastora Pérez-Pérez (Sociedad  
51  
52 Española de Calidad Asistencial, Spain), Matilde Lahera-Martín, Carmen Silvestre-  
53  
54 Busto (Servicio Navarro de Salud-Osasunbidea), Susana Lorenzo-Martínez (Hospital  
55  
56 Universitario Fundación Alcorcón, Madrid, Spain), Ascensión Sánchez-Martínez  
57  
58  
59  
60

1  
2  
3 (Hospital General Universitario Reina Sofía, Murcia, Spain), Bárbara Marco-Gómez,  
4  
5 Cristina Abad-Bouzán (Zona de Salud de Calatayud, Zaragoza, Spain), Carlos Aibar-  
6  
7 Remón (Hospital Clínico Universitario Lozano Blesa, Zaragoza), and Jesús María  
8  
9 Aranz-Andrés (Hospital Universitario Ramón y Cajal).  
10  
11  
12  
13  
14  
15

16 **Keywords:** COVID-19, healthcare professionals, psychological impact, acute stress,  
17  
18 mental health, hospital, primary care  
19  
20  
21

22 **Word count:** 4,049  
23  
24  
25  
26  
27  
28  
29  
30  
31  
32  
33  
34  
35  
36  
37  
38  
39  
40  
41  
42  
43  
44  
45  
46  
47  
48  
49  
50  
51  
52  
53  
54  
55  
56  
57  
58  
59  
60

## Abstract

Objectives: To determine the volume of health professionals who suffered distress due to their care COVID-19 patients and to analyse the direction in which the response capacity of the professionals to face future waves of COVID-19 is evolving.

Design: A cross-sectional study.

Setting: Primary care and hospitals in Spain.

Participants: A non-randomised sample of 685 professionals (physicians, nurses, and other health staff).

Primary and secondary outcome measures: Frequency and intensity of stress responses measured by the Acute Stress of Health Professionals Caring COVID-19 Scale (EASE).

Variation of stress responses according to the number of deaths per day per territory and the evolutionary stage of the COVID-19 outbreak measured by the Kruskal Wallis and the Mann-Whitney U tests.

Results: The average score on the EASE scale was 11.1 (SD 6.7) out of 30. Among the participants, 44.2% presented a good emotional adjustment, 27.4% a tolerable level of distress, 23.9% medium-high emotional load, and 4.5% extreme acute stress. The stress responses were more intense in the most affected territories (12.1 vs 9.3,  $p=0.003$ ) and during the disillusionment phase (12.7 vs 8.5 impact, 10.2 heroic, and 9.8 honeymoon,  $p=0.000$ ).

Conclusions: The pandemic has affected the mental health of a significant proportion of health professionals which may reduce their resilience in the face of future waves of COVID-19. The institutional approaches to support the psychological needs of health professionals are essential to ensure optimal care considering these results.

## Strengths and limitations of this study

- This is an observational study to determine the volume of health professionals who present a high level of acute stress due to their care of patients with COVID-19 that may prevent them from carrying out their functions and to analyse the direction in which the response capacity of the professionals to face future waves of COVID-19 is evolving.
- This study used a scale specifically designed to assess acute stress of health professionals in direct contact with patients with COVID-19 (EASE Scale). This scale was previously validated.
- The study was conducted in Spain between March 18 and May 17, 2020, coinciding with the phase of greatest acceleration and subsequent flattening of the curve of the pandemic. In this study, it has been shown how the impact of the first outbreak has left the workforce emotionally drained, which could limit their ability to adequately play their role in the face of a possible outbreak.
- The scale was not administered to a random sample of the population, which could limit the generalizability of the results. Also, the scale may have reached different sectors of the study population unevenly due to the means used to distribute it.
- Only basic socio-demographic data were collected from health professionals. No comparisons among subgroups were calculated.

**Funding:** This research received no specific grant from any funding agency in the public, commercial or not-for-profit sectors.

1  
2  
3 **Competing interests:** None declared.  
4  
5

6 **Contributors:** JJM conceived and designed the work. JJM, IC, MG and MVPJ designed  
7  
8 the scale. MAV and CF developed the web and mobile app for the online administration  
9  
10 of the scale. JMD was responsible for the recruitment of participants. AM performed the  
11  
12 statistical analysis. IC and MG wrote a first draft of the manuscript, which was critically  
13  
14 reviewed for important intellectual content by JJM and JMD. All authors reviewed the  
15  
16 draft and approved the final version of the manuscript.  
17  
18  
19

20  
21 **Data sharing statement:** Data are available upon reasonable request.  
22  
23

24 **Ethical approval:** The study protocol was approved by the Research Committee of the  
25  
26 San Juan University Hospital in Alicante (8th of April 2020).  
27  
28  
29  
30  
31  
32  
33  
34  
35  
36  
37  
38  
39  
40  
41  
42  
43  
44  
45  
46  
47  
48  
49  
50  
51  
52  
53  
54  
55  
56  
57  
58  
59  
60



## Introduction

As of August, the 26th, COVID-19 pandemic has caused 819.830 deaths worldwide, 28,924 in Spain.[1] The number of professionals suffering from COVID-19 is substantial. In Spain, it accounts for 21% of the total number of people infected.[2]

Although the incidence of the pandemic has expanded differently, among the geographical areas of each country, most hospitals and health centres around the world have had to reorganise themselves to prioritise the care of COVID-19 patients, breaking with their usual work dynamics. In addition to this cause of work-related stress, there has been uncertainty in decision-making and a lack of resources to adequately treat patients and protect against possible contagion.[3-4] These circumstances have posed an additional risk to patient safety,[5] which may have adversely affected quality of health care.[6]

The intensity of compassion fatigue,[7] post-traumatic stress[8-9] and moral injury[10-11] observed among professionals can be expected to depend on the intensity of the spread of the pandemic, the resources available, and individual differences in stress response. Likewise, the extent of trauma experienced by professionals may also be influenced by factors that are not directly related to the health care response, such as family income and living situation, self-perceived health status, gender, personality traits, and coping styles.[12-13]

Results of studies quantifying the magnitude of the impact of COVID-19 patient care on the mental health of healthcare professionals have been published since the beginning of the pandemic. These findings have varied widely due to the heterogeneity of the methodologies and instruments used.[14]

1  
2  
3  
4 In the first studies, carried out at the beginning of February, 71.5% of healthcare  
5  
6 personnel, mostly from the province of Hubei in China, presented emotional  
7  
8 discomfort,[15] with frequent depressive symptoms (55.7%), anxiety responses  
9  
10 (44.7%)[16] and insomnia (78,4%).[17] In Italy, in the days before the peak of infections  
11  
12 (end of March), 49.4% of health professionals reported symptoms of post-traumatic  
13  
14 stress.[18] In Ecuador, in the second half of April, 90% of the medical and nursing staff  
15  
16 already presented moderate-severe burnout levels.[19] In Spain, after the first wave of  
17  
18 hospital care (April-May), 79.5% and 51.1% of health professionals presented symptoms  
19  
20 of anxiety and depression, respectively.[20] The expansion of the pandemic in each  
21  
22 territory has determined the magnitude of the emotional response. In China, sleep  
23  
24 disorders and psychological symptoms were more frequent among medical staff in  
25  
26 Wuhan than among staff in Ningbo.[21] A recent meta-analysis showed that depression,  
27  
28 anxiety and psychological distress were common responses in health professionals  
29  
30 during the COVID-19 outbreak, is more likely in women and in those who had direct  
31  
32 contact with positive cases of COVID-19.[22]

33  
34  
35  
36  
37  
38  
39  
40 The magnitude and exceptionality of the situation justify these results. The experience  
41  
42 of the crisis affects the entire staff and all professional levels, including support staff in  
43  
44 healthcare (IT, suppliers, janitors, etc.). The complete absence of impact in mental health  
45  
46 on the staff of health institutions would be difficult to explain. However, the most  
47  
48 important question is not the number of professionals who have been emotionally  
49  
50 affected as a result of their assistance services, a circumstance that has been  
51  
52 aggravated by this crisis but is inherent to the work they do, but rather how many have  
53  
54 not managed to recover, how their resilience is evolving or to what extent they can deal  
55  
56 with a possible new outbreak.  
57  
58  
59  
60

1  
2  
3 Most studies have analysed the emotional responses in a short period (approximately  
4 one week) coinciding with a specific stage of the crisis. However, studies on community  
5 coping with catastrophic situations have described that the psychological response  
6 evolves resulting in: impact phase, heroic (intensification of efforts), honeymoon  
7 (optimism), disillusionment (fatigue) and reconstruction (recovery pre-crisis levels).[23]  
8  
9 Therefore, it is expected that the effects of the pandemic on the psychological response  
10 of health professionals will vary as the pandemic evolves and affect their resilience to a  
11 new outbreak. At the moment, there are no known studies that have addressed the  
12 problem from this perspective.  
13  
14

15  
16 The objectives of this study were, first, to determine the volume of health professionals  
17 who, because of the impact of the COVID-19 pandemic on the healthcare environment  
18 in which they work, experienced an excessive level of acute stress that prevented them  
19 from performing their role. Second, to analyse the direction in which the levels of the  
20 emotional response of professionals evolve to face a new outbreak, considering the  
21 variation in the frequency and intensity of their stress reactions in the different phases of  
22 the pandemic and according to the areas with the greater or lesser impact of the  
23 pandemic.  
24  
25  
26  
27  
28  
29  
30  
31  
32  
33  
34  
35  
36  
37  
38  
39  
40  
41  
42  
43  
44  
45  
46  
47

## 48 **Methods**

49  
50 A cross-sectional observational study in a non-randomised sample of Spanish  
51 healthcare professionals was conducted. The study was designed to analyse two  
52 assumptions. Firstly, since the results yielded in studies conducted elsewhere involving  
53 healthcare workforce caring COVID-19 patients, it was expected that between 3% and  
54  
55  
56  
57  
58  
59  
60

1  
2  
3 10,5% [9, 13, 24] of the healthcare professionals present psychological distress, with it  
4  
5 being more severe as the pandemic becomes more intense. So, as seen in other studies,  
6  
7 in those territories most affected by the pandemic, the percentage of professionals with  
8  
9 emotional distress is expected to be higher.[21] Finally, since the impact of the pandemic  
10  
11 should be directly related to the distress experienced by professionals, it was expected  
12  
13 that there will be a cumulative effect whereby the percentage of professionals with high  
14  
15 levels of stress will be greater in the more advanced phases of the model of the  
16  
17 psychological response during a disaster.[23]  
18  
19  
20  
21  
22

23 The study was conducted in Spain between March 18 and May 17, 2020, coinciding with  
24  
25 the phase of greatest acceleration and subsequent flattening of the curve of the  
26  
27 pandemic. The study protocol was approved by the Research Committee of the San  
28  
29 Juan University Hospital in Alicante (8th of April 2020).  
30  
31  
32

### 33 *Variables and instrument*

34  
35

36 We used a scale specifically designed to assess acute stress of health professionals in  
37  
38 direct contact with COVID-19 patients (EASE Scale) (supplementary material). This  
39  
40 scale was previously validated, first, a pragmatic literature review of items assessing  
41  
42 acute stress in healthcare professionals was conducted for possible inclusion, also, the  
43  
44 most relevant sources of acute stress, pointed by the professional's experiences were  
45  
46 represented into 17 reactive items; this number was finally reduced to 10 items, once  
47  
48 participants considered their representativeness and comprehension. The instrument  
49  
50 was validated following COSMIN protocol involving 228 Spanish physicians, and nurses,  
51  
52 it is composed of 10 items to which responses are given using a 4-level Likert type scale  
53  
54 (0 = It is not happening to me, 1 = It happens to me in concrete situations, 2 = It often  
55  
56 happens to me and 3 = I am like this all the time). The total score on the scale can range  
57  
58  
59  
60

1  
2  
3 from 0 to 30 points, with greater scores being interpreted as higher levels of stress.  
4  
5 Reliability was calculated using OMEGA (0.87) and Cronbach's Alpha (0.85). The items  
6  
7 were grouped by Exploratory Factor Analysis into two factors that evaluate: affective  
8  
9 response and fears and anxiety, explaining 55% of the variance. Factor 1, referring to  
10  
11 the affective response, is composed of 6 items, so that the direct score on this factor  
12  
13 ranges from 0 to 18 points. The factor 2 that evaluates fears and anxiety is composed of  
14  
15 4 items and its minimum and maximum possible scores are 0 and 12 respectively. The  
16  
17 interpretability of the score ranges was established: 0-9 points (good emotional  
18  
19 adjustment), 10-14 points (emotional distress), 15-24 points (medium-high emotional  
20  
21 overload), >25 points (extreme acute stress) [25].  
22  
23  
24  
25  
26  
27

### 28 *Participants*

29  
30 Healthcare professionals from primary care centres and hospitals. At the time the study  
31  
32 was conducted, the entire public health system was involved in the care of COVID-19  
33  
34 patients. Care for patients suffering other pathologies was suspended except for  
35  
36 emergencies and those that could not be delayed, in other situations care was provided  
37  
38 by telephone. We determined a minimum sample size of 650 professionals, considering  
39  
40 a population of 392,667 health professionals (hospitals and primary care) [26], an effect  
41  
42 size of 0.20, a statistical power of 95% and a confidence level of 95%.  
43  
44  
45  
46  
47

### 48 *Patient and Public Involvement*

49  
50 Patients or the public were not involved in any phase of this study.  
51  
52

### 53 *Procedure*

54  
55 The diffusion of the scale and data gathering was done in a twofold way. First, the scale  
56  
57 was made accessible through a web-based resource repository created by the authors  
58  
59  
60

1  
2  
3 to reduce the impact of the SARS-CoV-2 pandemic on the psychological well-being of  
4 healthcare professionals.[27] These resources to cope with acute stress during the worst  
5 moments of the pandemic were disseminated through several Spanish scientific  
6 societies, social media, and specialized press news. Second, the scale was accessible  
7 through the mobile application BE+ against COVID [28-29] which was disseminated  
8 using the same means and by leaders of occupational health and hospital patient safety  
9 units. The consenting procedure to participate in the study was inherent in the use of the  
10 website and app.  
11  
12  
13  
14  
15  
16  
17  
18  
19  
20  
21  
22

### 23 Acute stress responses

24  
25  
26 Scores on the scale equal to or higher than 15 points were considered the level of stress  
27 with the potential to limit the professional's optimal performance of his/her function or  
28 work activity.  
29  
30  
31  
32

### 33 Pandemic extension and acute stress responses

34  
35  
36 The results of the self-assessment using this scale were linked to the data on the  
37 evolution of the pandemic in Spain using the data published daily by the Spanish Health  
38 Ministry, considering both the differences in impact between territories and the temporal  
39 phases of its evolution.  
40  
41  
42  
43  
44

45  
46 To determine the territories most and least affected by the pandemic on May 17th, 2020,  
47 the country was divided into two groups according to the number of deaths from COVID-  
48 19. The first group included Madrid, and Catalonia, with more than 5,000 deaths. The  
49 second group included Asturias, the Balearic Islands, the Canary Islands, Cantabria,  
50 Extremadura, La Rioja, Murcia, and Navarre with less than 500 deaths. To compare  
51 results on the EASE scale according to the territory, a sub-sample of 336 participants  
52  
53  
54  
55  
56  
57  
58  
59  
60

1  
2  
3 working in health institutions in the regions specified above was selected. The  
4  
5 comparison was made between the most and least affected territories.  
6  
7  
8  
9  
10

#### 11 Acute stress during the outbreak evolution

12  
13  
14 To analyse acute stress during the pandemic, four moments of the evolution of the  
15 outbreak were determined according to the number of deaths per day: less than 500  
16 (03/18 - 03/25), between 600 and 900 (03/28 - 04/15), between 300 and 600 (04/16 -  
17 04/26) and less than 300 (04/27 - 05/17). The periods described corresponded to the  
18 phases of the community's psychological response to the pandemic: impact (awareness  
19 of the problem, less than 500 deaths/day), heroic (increased efforts to cope with the crisis  
20 and mitigate the impact, between 600 and 900 deaths/day), honeymoon (hope, between  
21 300 and 600 deaths/day) and disillusionment (accumulated fatigue, less than 300  
22 deaths/day). For the temporal definition of the phases, data on deaths per day were  
23 extracted from the dashboard of the Spanish Health Ministry.  
24  
25  
26  
27  
28  
29  
30  
31  
32  
33  
34  
35  
36  
37  
38

#### 39 *Statistical analysis*

40  
41 Descriptive and frequency analyses were performed. Mean scores on each factor were  
42 transformed to a 0-10 scale to allow comparison because the number of items was  
43 different on each factor. The Kruskal Wallis test and the Mann-Whitney U test were used  
44 to determine the differences in acute stress reactions according to the time of evolution  
45 of the pandemic and the degree to which the territory was affected, respectively. Also,  
46 responses on the Be+ against COVID app and the Website were compared. The  
47 comparative analyses of scores on the EASE scale were conducted item by item, by  
48  
49  
50  
51  
52  
53  
54  
55  
56  
57  
58  
59  
60

1  
2  
3 scale factors and overall score. The confidence interval used was 95%. Data coding and  
4  
5 analysis was performed using IBM SPSS Statistics software, version 25.  
6  
7  
8  
9  
10

## 11 **Results**

12  
13  
14 A total of 685 professionals responded. Of these, 28.6% (n=196) were doctors, 39%  
15  
16 (n=267) were nurses and 32.3% (n=222) were other healthcare staff (including advanced  
17  
18 technicians in nursing auxiliary care, radiodiagnosis, and clinical diagnostic laboratory).  
19  
20 A majority of them reported working in a hospital setting 81.9% (n=561), in primary care  
21  
22 8% (n=55) and in both care levels 10.1% (n=69). 40.4% worked in areas where the  
23  
24 pandemic had had a greater impact. Most of them worked in Madrid (37%), Valencia  
25  
26 (15.7%), Andalusia (14.1%) and Catalonia (3.3%).  
27  
28  
29

### 30 *Scores on the EASE scale*

31  
32  
33 The mean total score on the scale was 11.1 points (SD 6.7, 95% CI 10.6 - 11.6, range  
34  
35 0-30), with 23.9% (n=164) with a medium-high level of emotional load, and 4.5% (n=31)  
36  
37 showing an extreme level of acute stress. Scores between the emotional response factor  
38  
39 vs. the fear/anxiety factor no differences were observed, 3.6 (SD 2.4) vs. 3.8 (SD=2.5);  
40  
41 p=0.2 (score transformed into a scale of 0 to 10 points).  
42  
43  
44  
45  
46

47  
48 Three hundred and forty-one (49.8%) of the health professionals highlighted that they  
49  
50 had difficulties in being able to disconnect from work and 49% (n=335) expressed fear  
51  
52 of infecting their family once they returned home at the end of the working day. 23%  
53  
54 (n=157) expressed concerns about not falling ill and 17% (n=116) experienced difficulties  
55  
56 in empathizing with the suffering of the patients (Table 1).  
57  
58  
59  
60



1  
2  
3 Scores on the EASE scale were similar among the professional categories ( $p=0.46$ ).

4  
5 Only, differences were found between the scores for the statement related to maintaining  
6  
7  
8 emotional distance with people ( $p=0.03$ ). Nurses scored higher than doctors or others.  
9

10  
11 Differences were found in the scores, in the use of the two platforms Website vs Be+  
12  
13 against COVID to respond to the EASE scale (10.5; SD 6.3 vs 11.8; SD 7.1;  $p=0.008$ ).

14  
15 However, the use of the app was mostly employed by professionals from territories with  
16  
17 greater expansion of the pandemic 66% ( $n=206$ ) vs 21.1% ( $n=79$ ). 45.5% ( $n=312$ )  
18  
19 answered the questionnaire through the app and 54.5% ( $n=373$ ) through the website.  
20  
21

#### 22 23 *EASE scale scores in territories with a higher incidence rate*

24  
25 The average score on the EASE scale was higher (up to 30% more) in those territories  
26  
27 with a higher number of recorded deaths compared to those territories that had a lower  
28  
29 number (12.1 vs 9.3  $p=0.003$ ) (Table 2). Despite the different affection between  
30  
31 territories, there were aspects in which these differences were not observed, such as  
32  
33 completely losing the taste for things that previously produced tranquillity or well-being  
34  
35 ( $p=0.50$ ), feeling that people who required the help of the professional were being  
36  
37 neglected ( $p=0.37$ ), feeling emotionally blocked ( $p=0.37$ ) or having difficulties in  
38  
39 empathizing with the patients' suffering ( $p=0.93$ ).  
40  
41  
42  
43  
44

#### 45 46 *EASE scale scores according to the evolution of the pandemic and the different phases* 47 48 *of psychological response to the disaster*

49  
50 The average scores on the EASE scale were higher in the disillusionment phase (April  
51  
52 27-May 17, 2020) compared to the first period defined as the impact or awareness phase  
53  
54 (March 18-March 25, 2020) (12.7 vs 8.5  $p<0.0001$ ) (Table 3).  
55  
56  
57  
58  
59  
60

## Discussion

Acute stress was manifested mainly by the inability to disconnect from work and the fear of infecting loved ones. Losing empathy for the suffering of patients and fear of becoming ill are the statements that probably best discriminate against professionals whose condition prevents them from continuing with their care work. This study backs up what has been suggested in previous studies that approximately 5% of the healthcare professionals suffered an extreme level of acute stress as a consequence of caring COVID-19 patients [9, 13, 24]. Considering these results, the targets for the interventions designed to cope with distress due to the COVID-19 pandemic [30] must take in account that approximately a quarter of professionals could need support not to evolve towards situations of extreme acute stress.

### *Intense emotional responses in territories with a higher incidence rate*

This research suggests the level of acute stress experienced by Spanish professionals is higher as the damage from COVID-19 increases in patients. As expected, acute stress has been higher in those territories where the pandemic has had a greater impact in terms of the incidence of COVID-19 cases and deaths from this disease.

Those professionals working in territories where the pandemic has been particularly aggressive show more intense emotional responses in those elements related to thoughts, fears, and physiological reactions because of the situation they are living. This result has not been observed with the fact of being emotionally blocked to think and take decisions or with the difficulty to empathize with the suffering of patients, these emotional responses could be developed in later stages.[31]

1  
2  
3 Distress, therefore, appear to be associated with the pressures and demands caused by  
4  
5 the pandemic, although it has not been possible to determine whether increased  
6  
7 availability of resources or support programs might have alleviated their effects.  
8  
9

10  
11 *Intense emotional responses in the final phases of psychological response according to*  
12  
13 *the evolution of the pandemic*  
14  
15

16 The evolution observed in the stress response of professionals is largely in line with the  
17  
18 phases proposed by the psychological disaster response model.[23] The level of acute  
19  
20 stress manifested by professionals in the disillusionment phase is greater than the stress  
21  
22 experienced during the impact phase. This result confirms the expected outcome and is  
23  
24 suggesting that the capacity to deal with a new outbreak will be diminished if there is not  
25  
26 enough time between outbreaks to allow for recovery or if decisive action is not taken to  
27  
28 recover.  
29  
30  
31

32  
33 *Purpose- built measure*  
34  
35

36 This study used a scale specifically designed to discriminate between situations that  
37  
38 cause acute stress in the course of caring for COVID-19 patients, unlike other studies  
39  
40 that used scales to screen for symptoms of anxiety and depression.[15, 32-33] This scale  
41  
42 was based on the premise that the response to the consequences of the pandemic could  
43  
44 not leave professionals indifferent and that the sources of stress that could disable  
45  
46 professional duties would be quite different from those included in most instruments  
47  
48 designed for other purposes. This differential element must be considered when  
49  
50 interpreting the results, given that most of the studies that have so far evaluated the  
51  
52 psychological impact of the COVID-19 pandemic on health professionals have used  
53  
54 questionnaires that were validated under different conditions than the current ones. The  
55  
56  
57  
58  
59  
60

1  
2  
3 EASE scale has been sensitive to these changes, allowing the impact of the pandemic  
4  
5 on health professionals to be assessed[10-11] and it can be expected to be useful for  
6  
7 measuring the effects on emotional response and coping capacity if there is a  
8  
9 resurgence.  
10  
11

12  
13 This scale has reflected, above all, that they were unable to disconnect from work,  
14  
15 experienced irritability, anxiety, fear of infecting their families, and doubts about their  
16  
17 ability to make decisions in clinical practice. However, most of the scores reported by  
18  
19 health professionals were in the first and second range of the scale (mild level of  
20  
21 emotional distress). These data show that most professionals have not experienced,  
22  
23 according to the EASE scale scores, levels of extreme acute stress. This result suggests  
24  
25 that we must differentiate between the emotional impact that can be expected from the  
26  
27 stress of the crisis and that other emotional impact that prevents the responsibilities of  
28  
29 the profession from being carried out with the appropriate guarantees for patients. These  
30  
31 results confirm the existence of emotional discomfort in the staff, identifies in what this  
32  
33 discomfort translates to, and that only 1 out of 20 professionals have been emotionally  
34  
35 overwhelmed and with difficulties in carrying out their work.  
36  
37  
38  
39  
40

41  
42 In the case of a new outbreak, the data suggest that to determine the level of impact on  
43  
44 the mental health of health professionals, the following should be considered: employing  
45  
46 instruments used to identify the sources of stress or to measure acute stress associated  
47  
48 with the care of COVID-19 patients rather than instruments designed for screening  
49  
50 anxiety or depression; measurements should consider the care pressure faced by  
51  
52 professionals and the evolution of this pressure over time because that is when it  
53  
54 decreases when the intensity of acute stress increases.  
55  
56  
57  
58  
59

60 *Applications of this study*

1  
2  
3 The SARS-CoV-2 pandemic has caused an unprecedented health crisis that has shaken  
4 the foundations of health systems around the world, requiring responses that were not  
5 always prepared. One reflection is the number of professionals infected. In Spain, as of  
6 18 June, 52,036 health professionals had contracted the COVID-19 disease and just  
7 over 13% of those hospitalized required admission to the Intensive Care Unit.[2] This  
8 fact, added to the emotional response to the health crisis, has led to their being identified  
9 as the second victim of SARS-CoV-2.  
10  
11  
12  
13  
14  
15  
16  
17  
18  
19

20 The term "second victim"[34] applied to healthcare personnel has been used over the  
21 last two decades to refer to the emotional distress experienced by healthcare  
22 professionals when they suspect that they have been involved in a safety incident that  
23 has resulted in harm to the patient or when they observe that the patient in their care is  
24 not developing properly and their decisions and actions are being questioned. In the  
25 current scenario, where the healthcare professional has not had the appropriate means  
26 to cure and care for patients, we extend the concept of the second victim to refer to any  
27 healthcare or support professional involved in the care of people affected by COVID-19,  
28 who presents acute stress responses when continuously exposed to an extreme  
29 situation caused by the combination of a series of critical factors, including social alarm,  
30 oversaturation of services, scarcity of resources and the poor evolution of the patients  
31 under their care.  
32  
33  
34  
35  
36  
37  
38  
39  
40  
41  
42  
43  
44  
45  
46  
47  
48  
49

50 The response to the emotional and psychological needs that the staff of health  
51 institutions is experiencing as a result of this situation is justified not only on ethical  
52 grounds but also to ensure quality care and patient safety.[35] Precisely the recovery of  
53 these systems after the COVID-19 crisis that requires restoring the working morale and  
54 welfare of health professionals and strengthening their capacity for resilience.[36] Some  
55  
56  
57  
58  
59  
60

1  
2  
3 authors suggest adopting measures based on the social support provided by co-workers  
4  
5 or peers.[37-38] Digital initiatives have also been developed in the form of broader  
6  
7 programmes that integrate social support as one of their resources to mitigate the impact  
8  
9 of COVID-19 on health professionals.[10, 30]  
10  
11

12  
13 Despite the recent emergence of tools to measure the effects of the pandemic on mental  
14  
15 health and behaviour in the general population, [39-41] there are still no specific  
16  
17 measures designed and validated for evaluation in health professionals. As far as we  
18  
19 are aware, this study is the first to explore the emotional distress caused by the COVID-  
20  
21 19 health crisis and one of the first to use a specifically validated measure for this  
22  
23 purpose.  
24  
25

### 26 27 28 *Limitations* 29

30  
31 This study was conducted using a scale that was not administered to a random sample  
32  
33 of the population which could limit the generalizability of the findings. During the  
34  
35 pandemic, depending on the care needs of the territories, primary care professionals  
36  
37 moved to work in hospitals (e.g., field hospitals). The scale may have reached different  
38  
39 sectors of the study population unevenly due to the media used. Access to the scale by  
40  
41 participants via their well-being repository may have overrepresented the response of  
42  
43 professionals who were feeling more distressed. Those days the entire health system  
44  
45 was dedicated to the care of COVID-19 patients. No specific procedure was used to  
46  
47 confirm that respondents to the scale were working caring COVID-19 patients at the time  
48  
49 of the outbreak, despite prior instructions requiring this. The motivation of respondents  
50  
51 and those who chose not to respond could have biased the sample and therefore the  
52  
53 results. The study looked at a small number of sociodemographic variables with the  
54  
55 intention that participants would feel that their privacy was guaranteed when completing  
56  
57  
58  
59  
60

1  
2  
3 the scale. This decision has limited the possibilities of comparative analysis of stress  
4 responses by groups. It also prevented intrasubject comparisons at different times of the  
5 crisis. The comparative analyses between the most and least affected territories only  
6 took into account the number of deaths/day without controlling for other variables that  
7 could be influencing the impact of the pandemic on the health centre and its  
8 professionals, such as access to equipment, human resources, among others. it should  
9 be considered that during the pandemic, there was an increase in personnel and  
10 resources throughout the health system in response to an emergency that could not be  
11 quantified. The training of this staff to perform their new function could not be considered  
12 which could affect their stress levels.

### 26 27 *Conclusion*

28  
29  
30 Over time, we have become more scientifically and technically prepared to deal with  
31 COVID-19 and have learned multiple lessons on how to best deal with this crisis, but the  
32 impact of the first outbreak has left the workforce emotionally drained, which could limit  
33 their ability to properly perform their role in the face of a possible outbreak. Consequently,  
34 health institutions in the process of workforce recovery must incorporate measures to  
35 restore the well-being and work morale of healthcare professionals. This study  
36 demonstrates this, confirming that emotional difficulties begin to appear at the end of the  
37 most critical phases of the pandemic.

### 52 53 **References**

- 54  
55  
56 1. Johns Hopkins University & Medicine. Coronavirus Resource Center. COVID-19  
57 Dashboard by the Center for Systems Science and Engineering (CSSE) at Johns  
58  
59  
60

1  
2  
3 Hopkins University (JHU) [Internet, 08.07.2020]. Available from:  
4  
5  
6 <https://coronavirus.jhu.edu/map.html>  
7

8  
9 2. Corporación Radio y Televisión Española (rtve). Los profesionales sanitarios  
10 contagiados de COVID-19 superan los 52.000, 81 en la última semana [Internet,  
11 06.19.2020]. Available from: [https://www.rtve.es/noticias/20200619/profesionales-](https://www.rtve.es/noticias/20200619/profesionales-sanitarios-contagiados-covid-19-superan-50000/2014047.shtml)  
12  
13 [sanitarios-contagiados-covid-19-superan-50000/2014047.shtml](https://www.rtve.es/noticias/20200619/profesionales-sanitarios-contagiados-covid-19-superan-50000/2014047.shtml)  
14  
15  
16

17  
18 3. Binkley CE, Kemp DS. Ethical Rationing of Personal Protective Equipment to Minimize  
19 Moral Residue During the COVID-19 Pandemic. *J Am Coll Surg*. 2020;230:1111-3. doi:  
20  
21 10.1016/j.jamcollsurg.2020.03.031  
22  
23  
24

25  
26 4. Steinberg E, Balakrishna A, Habboushe J, *et al*. Calculated Decisions: COVID-19  
27 Calculators During Extreme Resource-Limited Situations. *Emerg Med Pract*  
28 2020;22:CD1-5.  
29  
30  
31  
32

33  
34 5. Hall LH, Johnson J, Watt I, *et al*. Healthcare Staff Wellbeing, Burnout, and Patient  
35 Safety: A Systematic Review. *PLoS One* 2016;11:e0159015.  
36  
37  
38

39  
40 6. Wallace JE, Lemaire JB, Ghali WA. Physician Wellness: A Missing Quality Indicator.  
41 *Lancet* 2009;374:1714:21. doi: 10.1016/S0140-6736(09)61424-0  
42  
43

44  
45 7. Alharbi J, Jackson D, Usher K. The potential for COVID-19 to contribute to compassion  
46 fatigue in critical care nurses. *J Clin Nurs* 2020 [online ahead of print]. doi:  
47 10.1111/jocn.15314.  
48  
49  
50

51  
52 8. Restauri N, Sheridan AD. Burnout and Posttraumatic Stress Disorder in the  
53 Coronavirus Disease 2019 (COVID-19) Pandemic: Intersection, Impact, and  
54 Interventions. *J Am Coll Radiol* 2020 [online ahead of print]. doi:  
55 10.1016/j.jacr.2020.05.021  
56  
57  
58  
59  
60



- 1  
2  
3  
4 9. Huang JZ, Han MF, Luo TD, *et al.* Mental Health Survey of Medical Staff in a Tertiary  
5  
6 Infectious Disease Hospital for COVID-19. *Zhonghua Lao Dong Wei Sheng Zhi Ye Bing*  
7  
8 *Za Zhi* 2020;**38**:192-5. doi: 10.3760/cma.j.cn121094-20200219-00063  
9
- 10  
11 10. Williamson V, Murphy D, Greenberg N. COVID-19 and experiences of moral injury  
12  
13 in front-line key workers. *Occup Med (Lond)* 2020:kqaa052. doi:  
14  
15 10.1093/occmed/kqaa052  
16  
17
- 18 11. Williams RD, Brundage JA, Williams EB. Moral Injury in Times of COVID-19. *Health*  
19  
20 *Serv Psychol* 2020:1-5. doi: 10.1007/s42843-020-00011-4  
21  
22
- 23 12. DiGangi JA, Gomez D, Mendoza L, *et al.* Pretrauma risk factors for posttraumatic  
24  
25 stress disorder: A systematic review of the literature. *Clin Psychol Rev* 2013;**33**:728-44.  
26  
27 doi: 10.1016/j.cpr.2013.05.002  
28  
29
- 30 13. Guo J, Wu P, Tian D, *et al.* Post-traumatic Stress Disorder among adult survivors of  
31  
32 the Wenchuan Earthquake in China: A repeated cross-sectional study. *J Anxiety Disord*  
33  
34 2014;**28**:75-82. doi: 10.1016/j.janxdis.2013.12.001  
35  
36  
37
- 38 14. Pappa S, Ntella V, Giannakas T, *et al.* Prevalence of depression, anxiety, and  
39  
40 insomnia among healthcare workers during the COVID-19 pandemic: A systematic  
41  
42 review and meta-analysis. *Brain Behav Immun* 2020; S0889-1591(20)30845-X.  
43  
44 doi:10.1016/j.bbi.2020.05.026  
45  
46  
47
- 48 15. Lai J, Ma S, Wang Y, *et al.* Factors Associated With Mental Health Outcomes Among  
49  
50 Health Care Workers Exposed to Coronavirus Disease 2019. *JAMA Netw Open*  
51  
52 2020;**3**:e203976. doi:10.1001/jamanetworkopen.2020.3976  
53  
54  
55  
56  
57  
58  
59  
60

- 1  
2  
3 16. Zhang C, Yang L, Liu S, *et al.* Survey of Insomnia and Related Social Psychological  
4 Factors Among Medical Staff Involved in the 2019 Novel Coronavirus Disease Outbreak.  
5  
6 *Front Psychiatry* 2020;**11**:306. doi: 10.3389/fpsy.2020.00306  
7  
8  
9  
10  
11 17. Qi J, Xu J, Li BZ, *et al.* The evaluation of sleep disturbances for Chinese frontline  
12 medical workers under the outbreak of COVID-19. *Sleep Med* 2020;**72**:1-4. doi:  
13  
14 10.1016/j.sleep.2020.05.023  
15  
16  
17  
18 18. Rossi R, Socci V, Pacitti F, *et al.* Mental Health Outcomes Among Frontline and  
19 Second-Line Health Care Workers During the Coronavirus Disease 2019 (COVID-19)  
20 Pandemic in Italy. *JAMA Netw Open* 2020;**3**:e2010185.  
21  
22 doi:10.1001/jamanetworkopen.2020.10185  
23  
24  
25  
26  
27  
28 19. Vinueza Veloz AF, Aldaz Pachacama NR, Mera Segovia CM, *et al.* Síndrome de  
29 Burnout en médicos/as y enfermeros/as ecuatorianos durante la pandemia de COVID-  
30  
31 19. 2020 pre-print Scielo. Available from:  
32  
33 [https://www.google.com/url?sa=t&rct=j&q=&esrc=s&source=web&cd=&ved=2ahUKEwi](https://www.google.com/url?sa=t&rct=j&q=&esrc=s&source=web&cd=&ved=2ahUKEwiH8bCK5ZXqAhXTiFwKHfTxDmMQFjAAegQIAhAB&url=https%3A%2F%2Fpreprints.scielo.org%2Findex.php%2Fscielo%2Fpreprint%2Fdownload%2F708%2F958%2F988&u)  
34  
35 [H8bCK5ZXqAhXTiFwKHfTxDmMQFjAAegQIAhAB&url=https%3A%2F%2Fpreprints.sc](https://www.google.com/url?sa=t&rct=j&q=&esrc=s&source=web&cd=&ved=2ahUKEwiH8bCK5ZXqAhXTiFwKHfTxDmMQFjAAegQIAhAB&url=https%3A%2F%2Fpreprints.scielo.org%2Findex.php%2Fscielo%2Fpreprint%2Fdownload%2F708%2F958%2F988&u)  
36  
37 [ielo.org%2Findex.php%2Fscielo%2Fpreprint%2Fdownload%2F708%2F958%2F988&u](https://www.google.com/url?sa=t&rct=j&q=&esrc=s&source=web&cd=&ved=2ahUKEwiH8bCK5ZXqAhXTiFwKHfTxDmMQFjAAegQIAhAB&url=https%3A%2F%2Fpreprints.scielo.org%2Findex.php%2Fscielo%2Fpreprint%2Fdownload%2F708%2F958%2F988&u)  
38  
39 [sg=AOvVaw3PSHAVyRBM1rCJu6IL\\_xWI](https://www.google.com/url?sa=t&rct=j&q=&esrc=s&source=web&cd=&ved=2ahUKEwiH8bCK5ZXqAhXTiFwKHfTxDmMQFjAAegQIAhAB&url=https%3A%2F%2Fpreprints.scielo.org%2Findex.php%2Fscielo%2Fpreprint%2Fdownload%2F708%2F958%2F988&u)  
40  
41  
42  
43  
44  
45  
46 20. Universidad Autónoma de Madrid. El 79,5% de los sanitarios sufren ansiedad y el  
47  
48 40% se siente emocionalmente agotado tras la primera oleada de atención hospitalaria  
49 por Covid-19 [press statement]. Available from: [https://www.ucm.es/file/estres-](https://www.ucm.es/file/estres-sanitarios-mayo-2020)  
50  
51 [sanitarios-mayo-2020](https://www.ucm.es/file/estres-sanitarios-mayo-2020)  
52  
53  
54  
55  
56  
57  
58  
59  
60

- 1  
2  
3  
4 21. Li X, Yu H, Bian G, *et al.* Prevalence, risk factors, and clinical correlates of insomnia  
5  
6 in volunteer and at home medical staff during the COVID-19. *Brain Behav Immun*  
7  
8 2020;**87**:140-41. doi:10.1016/j.bbi.2020.05.008  
9  
10  
11 22. Chou R, Dana T, Buckley DI, *et al.* Epidemiology of and Risk Factors for Coronavirus  
12  
13 Infection in Health Care Workers: A Living Rapid Review. *Ann Intern Med* 2020;**173**:120-  
14  
15 36. doi:10.7326/M20-1632  
16  
17  
18 23. Myers D, Zunin L. Phases of disaster, in DeWolfe D (Ed.), Training Manual for Mental  
19  
20 Health and Human Service Workers in Major Disasters. Washington, DC: US  
21  
22 Government Printing Office; 2000.  
23  
24  
25  
26 24. Lu W, Wang H, Lin Y, *et al.* Psychological status of medical workforce during the  
27  
28 COVID-19 pandemic: A cross-sectional study. *Psychiatry Res* 2020;**288**:112936. doi:  
29  
30 10.1016/j.psychres.2020.112936  
31  
32  
33  
34 25. Mira JJ, Cobos-Vargas A, Martínez-García O, *et al.* The Acute Stress Scale in  
35  
36 healthcare professionals caring for patients with COVID-19. Validation study. PREPRINT  
37  
38 (Version 1, 16 July 2020). *Research Square* 2020. doi: 10.21203/rs.3.rs-39710/v1  
39  
40  
41  
42 26. Ministerio de Sanidad, Consumo y Bienestar Social. Portal Estadístico, Área de  
43  
44 Inteligencia de Gestión. Consulta Interactiva del Sistema Nacional de Salud [Internet].  
45  
46 2018. Available from:  
47  
48 [https://pestadistico.inteligenciadegestion.mscbs.es/publicoSNS/Comun/DefaultPublico.](https://pestadistico.inteligenciadegestion.mscbs.es/publicoSNS/Comun/DefaultPublico.aspx)  
49  
50 [aspx](https://pestadistico.inteligenciadegestion.mscbs.es/publicoSNS/Comun/DefaultPublico.aspx)  
51  
52  
53  
54 27. SARS-CoV-2 Second Victim Study Group. BE+ against COVID. SARS-CoV-2  
55  
56 (COVID-19) second victims [Internet]. Available from:  
57  
58 <https://secondvictimscovid19.umh.es/p/resource-09.html>  
59  
60

- 1  
2  
3  
4  
5  
6  
7  
8  
9  
10  
11  
12  
13  
14  
15  
16  
17  
18  
19  
20  
21  
22  
23  
24  
25  
26  
27  
28  
29  
30  
31  
32  
33  
34  
35  
36  
37  
38  
39  
40  
41  
42  
43  
44  
45  
46  
47  
48  
49  
50  
51  
52  
53  
54  
55  
56  
57  
58  
59  
60
28. BE+ against COVID, Google Play [Internet, mobile app]. Available from:  
<https://play.google.com/store/apps/details?id=com.appandabout.defusing>
29. BE+ against COVID, App Store [Internet, mobile app]. Available from:  
<https://apps.apple.com/es/app/ser-positivo-contra-covid/id1512478131>
30. Blake H, Bermingham F, Johson G, *et al.* Mitigating the Psychological Impact of COVID-19 on Healthcare Workers: A Digital Learning Package. *Int J Environ Res Public Health*. 2020;**17**:2997. doi: 10.3390/ijerph17092997
31. Kadhum M, Farrell S, Hussain R, *et al.* Mental wellbeing in surgical trainees: implications for the post-COVID-19 era. *Br J Surg* 2020;**107**:e264. doi: 10.1002/bjs.11726
32. Liu CY, Yang YZ, Zhang XM, *et al.* The prevalence and influencing factors in anxiety in medical workers fighting COVID-19 in China: a cross-sectional survey. *Epidemiol Infect* 2020;**148**:e98. doi:10.1017/S0950268820001107
33. Wu Y, Wang J, Luo C, *et al.* A Comparison of Burnout Frequency Among Oncology Physicians and Nurses Working on the Frontline and Usual Wards During the COVID-19 Epidemic in Wuhan, China. *J Pain Symptom Manage* 2020;**60**:e60-5. doi:10.1016/j.jpainsymman.2020.04.008
34. Wu AW. Medical error: the second victim. The doctor who makes the mistake needs help too. *BMJ* 2000;**320**:726-27. doi: 10.1136/bmj.320.7237.726
35. Grant S, Davidson K, Manages K, *et al.* Creating Healthful Work Environments to Deliver on the Quadruple Aim: A Call to Action. *J Nurs Adm* 2020;**50**:314-21. doi: 10.1097/NNA.0000000000000891

- 1  
2  
3 36. Rangachari P, Woods J. Preserving Organizational Resilience, Patient Safety, and  
4 Staff Retention during COVID-19 Requires a Holistic Consideration of the Psychological  
5 Safety of Healthcare Workers. *Int J Environ Res Public Health* 2020;**17**:E1267. doi:  
6 10.3390/ijerph17124267  
7  
8  
9  
10  
11  
12  
13 37. Wu AW, Connors C, Everly Jr GS. COVID-19: Peer Support and Crisis  
14 Communication Strategies to Promote Institutional Resilience. *Ann Intern Med* 2020;  
15 M20-1236. doi: 10.7326/M20-1236  
16  
17  
18  
19  
20  
21 38. Albott CS, Wozniak JR, McGlinch BP, *et al.* Battle Buddies: Rapid Deployment of a  
22 Psychological Resilience Intervention for Health Care Workers During the COVID-19  
23 Pandemic. *Anesth Analg* 2020;**131**:43-54. doi:10.1213/ANE.0000000000004912  
24  
25  
26  
27  
28  
29 39. Ahorsu DK, Lin CY, Imani V, *et al.* The Fear of COVID-19 Scale: Development and  
30 Initial Validation. *Int J Ment Health Addict* 2020;1-9. doi:10.1007/s11469-020-00270-8  
31  
32  
33  
34 40. Chandu VC, Pachava S, Vadapalli V, *et al.* Development and Initial Validation of the  
35 COVID-19 Anxiety Scale. *Indian J Public Health* 2020;**64**:S201-04.  
36 doi:10.4103/ijph.IJPH\_492\_20  
37  
38  
39  
40  
41 41. Taylor S, Landry CA, Paluszek MM, *et al.* Development and initial validation of the  
42 COVID Stress Scales. *J Anxiety Disord* 2020;**72**:102232.  
43 doi:10.1016/j.janxdis.2020.102232  
44  
45  
46  
47  
48  
49  
50  
51  
52  
53  
54  
55  
56  
57  
58  
59  
60

Table 1. EASE Scores on the COVID-19 Acute Stress in Care Scale

|                                                                                                                                          | Mean (IC<br>95%)   | SD  | It often<br>happens to me<br>(%) | I am like this<br>all the time (%) |
|------------------------------------------------------------------------------------------------------------------------------------------|--------------------|-----|----------------------------------|------------------------------------|
| I can't help but think of recent critical situations. I can't get out of work.                                                           | 1.5 (1.4 – 1.6)    | 1.0 | 33.4                             | 16.4                               |
| I have completely lost the taste for things that gave me peace of mind.                                                                  | 1.1 (1.0 – 1.2)    | 0.9 | 25.5                             | 8.0                                |
| I keep my distance, I resent dealing with people, I'm irascible even at home.                                                            | 1.3 (1.2 – 1.4)    | 1.0 | 24.4                             | 12.8                               |
| I feel that I am neglecting many people who need my help.                                                                                | 1.0 (0.9 – 1.1)    | 1.0 | 21.5                             | 9.2                                |
| I have difficulty thinking and making decisions, I have many doubts, I have entered a kind of emotional blockage.                        | 1.1 (1.0 – 1.1)    | 1.0 | 23.1                             | 8.9                                |
| I feel intense physiological reactions (shocks, sweating, dizziness, shortness of breath, insomnia, etc.) related to the current crisis. | 1.2 (1.1 – 1.3)    | 1.0 | 25.5                             | 11.2                               |
| I feel on permanent alert. I believe that my reactions now put other patients, my colleagues, or myself at risk.                         | 1.0 (0.9 – 1.1)    | 1.0 | 20.7                             | 9.9                                |
| Worrying about not getting sick causes me a strain that's hard to bear.                                                                  | 0.9 (0.8 – 1.0)    | 0.9 | 16.4                             | 7.6                                |
| I'm afraid I'm going to infect my family.                                                                                                | 1.5 (1.4 – 1.6)    | 1.0 | 28.2                             | 20.7                               |
| I have difficulty empathizing with patients' suffering or connecting with their situation (emotional distancing, emotional anaesthesia). | 0.6 (0.5 – 0.7)    | 0.9 | 11.7                             | 5.8                                |
| Total score                                                                                                                              | 11.1 (10.6 – 11.6) | 6.7 | 23.9                             | 4.5                                |

---

|                              |                    |     |
|------------------------------|--------------------|-----|
| Factor 1. Affective response | 3.6 (3.4 –<br>3.8) | 2.4 |
| Factor 2. Fears and anxiety  | 3.8 (3.6 –<br>4.0) | 2.5 |

---

N=685

Scores from 0 to 3 points on each of the items on the scale

Scores from 0 to 30 in total on the scale

Score transformed from 0 to 10 points by a factor of 1

Score transformed from 0 to 10 points in factor 2

Mean difference between factors p=0.2

Table 2. Mean difference on EASE Scale between territories most and least affected by the SARS-CoV-2 pandemic

|                                                                                                                                          | Most affected territories <sup>a</sup> | Least affected territories <sup>b</sup> | p     |
|------------------------------------------------------------------------------------------------------------------------------------------|----------------------------------------|-----------------------------------------|-------|
| I can't help but think of recent critical situations. I can't get out of work.                                                           | 1.6                                    | 1.4                                     | 0.06  |
| I have completely lost the taste for things that gave me peace of mind.                                                                  | 1.1                                    | 1.1                                     | 0.50  |
| I keep my distance, I resent dealing with people, I'm irascible even at home.                                                            | 1.4                                    | 1.1                                     | 0.004 |
| I feel that I am neglecting many people who need my help.                                                                                | 1.1                                    | 0.9                                     | 0.12  |
| I have difficulty thinking and making decisions, I have many doubts, I have entered a kind of emotional blockage.                        | 1.2                                    | 1.0                                     | 0.37  |
| I feel intense physiological reactions (shocks, sweating, dizziness, shortness of breath, insomnia, etc.) related to the current crisis. | 1.3                                    | 0.8                                     | 0.00  |
| I feel on permanent alert. I believe that my reactions now put other patients, my colleagues, or myself at risk.                         | 1.1                                    | 0.7                                     | 0.02  |
| Worrying about not getting sick causes me a strain that's hard to bear.                                                                  | 1.0                                    | 0.6                                     | 0.004 |
| I'm afraid I'm going to infect my family.                                                                                                | 1.7                                    | 1.3                                     | 0.004 |
| I have difficulty empathizing with patients' suffering or connecting with their situation (emotional distancing, emotional anaesthesia). | 0.7                                    | 0.6                                     | 0.93  |
| Total score                                                                                                                              | 12.1                                   | 9.3                                     | 0.003 |
| Factor 1. Affective response                                                                                                             | 3.9                                    | 3.3                                     | 0.09  |
| Factor 2. Fears and anxiety                                                                                                              | 4.2                                    | 2.8                                     | 0.00  |

N=336

Scores from 0 to 3 points on each of the items on the scale

Scores from 0 to 30 in total on the scale

Score transformed from 0 to 10 points by a factor of 1

Score transformed from 0 to 10 points in factor 2

<sup>a</sup> Madrid y Cataluña (more than 5000 deaths by May the 17<sup>th</sup> 2020)



1  
2  
3  
4  
5  
6  
7  
8  
9  
10  
11  
12  
13  
14  
15  
16  
17  
18  
19  
20  
21  
22  
23  
24  
25  
26  
27  
28  
29  
30  
31  
32  
33  
34  
35  
36  
37  
38  
39  
40  
41  
42  
43  
44  
45  
46  
47  
48  
49  
50  
51  
52  
53  
54  
55  
56  
57  
58  
59  
60

---

<sup>b</sup> Asturias, Baleares, Canarias, Cantabria, Extremadura, La Rioja, Murcia y Navarra (less than 500 deaths by May the 17<sup>th</sup> 2020)

For peer review only

Table 3. Mean difference at four temporal moments of expansion of the SARS-COV-2 pandemic

|                                                                                                                                          | Impact <sup>a</sup> | Heroic <sup>b</sup> | Honeymoon <sup>c</sup> | Disillusionment <sup>d</sup> | p      |
|------------------------------------------------------------------------------------------------------------------------------------------|---------------------|---------------------|------------------------|------------------------------|--------|
| I can't help but think of recent critical situations. I can't get out of work.                                                           | 1.3                 | 1.4                 | 1.3                    | 1.6                          | <0.001 |
| I have completely lost the taste for things that gave me peace of mind.                                                                  | 0.6                 | 1.0                 | 1.1                    | 1.2                          | <0.001 |
| I keep my distance, I resent dealing with people, I'm irascible even at home.                                                            | 0.5                 | 1.1                 | 1.1                    | 1.5                          | <0.001 |
| I feel that I am neglecting many people who need my help.                                                                                | 0.7                 | 0.9                 | 0.9                    | 1.2                          | 0.01   |
| I have difficulty thinking and making decisions, I have many doubts, I have entered a kind of emotional blockage.                        | 0.8                 | 0.9                 | 0.9                    | 1.3                          | <0.001 |
| I feel intense physiological reactions (shocks, sweating, dizziness, shortness of breath, insomnia, etc.) related to the current crisis. | 0.7                 | 1.0                 | 1.1                    | 1.4                          | <0.001 |
| I feel on permanent alert. I believe that my reactions now put other patients, my colleagues, or myself at risk.                         | 1.0                 | 0.9                 | 0.8                    | 1.2                          | <0.001 |
| Worrying about not getting sick causes me a strain that's hard to bear.                                                                  | 0.9                 | 0.9                 | 0.8                    | 1.0                          | 0,22   |
| I'm afraid I'm going to infect my family.                                                                                                | 1.6                 | 1,3                 | 1,3                    | 1,7                          | <0.001 |
| I have difficulty empathizing with patients' suffering or connecting with their situation                                                | 0.4                 | 0.7                 | 0.5                    | 0.6                          | 0.42   |

|                                                   |     |      |     |      |        |
|---------------------------------------------------|-----|------|-----|------|--------|
| (emotional distancing,<br>emotional anaesthesia). |     |      |     |      |        |
| Total score                                       | 8.5 | 10.2 | 9.8 | 12.7 | <0.001 |
| Factor 1. Affective response                      | 2.4 | 3.3  | 3.3 | 4.1  | <0.001 |
| Factor 2. Fears and anxiety                       | 3.5 | 3.5  | 3.3 | 4.4  | <0.001 |

N=685

Scores from 0 to 3 points on each of the items on the scale

Scores from 0 to 30 in total on the scale

Score transformed from 0 to 10 points by a factor of 1

Score transformed from 0 to 10 points in factor 2

<sup>a</sup> From March 18<sup>th</sup> to March 25<sup>th</sup>, 2020 (less than 500 deaths per day)

<sup>b</sup> From March 28<sup>th</sup> to April 15<sup>th</sup>, 2020 (between 600 - 900 deaths per day)

<sup>c</sup> From April 16<sup>th</sup> to April 26<sup>th</sup>, 2020 (between 300 - 600 deaths per day)

<sup>d</sup> From April 27<sup>th</sup> to May 17<sup>th</sup>, 2020 (less than 300 deaths per day)

## Supplementary file. Acute Stress of Health Professionals Caring COVID-19 Scale (EASE SCALE)

Please answer the following questions according to the thoughts, emotions, sensations and actions you are experiencing during these days of crisis

|                                                                                                                                                   | It's not<br>happening to me | It happens to me<br>in concrete<br>situations | It often happens<br>to me | I'm like this all<br>the time |
|---------------------------------------------------------------------------------------------------------------------------------------------------|-----------------------------|-----------------------------------------------|---------------------------|-------------------------------|
| I can't help but think of recent critical situations. I can't get out of work                                                                     | <input type="checkbox"/>    | <input type="checkbox"/>                      | <input type="checkbox"/>  | <input type="checkbox"/>      |
| I have completely lost the taste for things that gave me peace of mind                                                                            | <input type="checkbox"/>    | <input type="checkbox"/>                      | <input type="checkbox"/>  | <input type="checkbox"/>      |
| I keep my distance, I resent dealing with people, I'm irascible even at home                                                                      | <input type="checkbox"/>    | <input type="checkbox"/>                      | <input type="checkbox"/>  | <input type="checkbox"/>      |
| I feel that I am neglecting many people who need my help                                                                                          | <input type="checkbox"/>    | <input type="checkbox"/>                      | <input type="checkbox"/>  | <input type="checkbox"/>      |
| I have difficulty thinking and making decisions, I have many doubts, I have entered a kind of emotional blockage                                  | <input type="checkbox"/>    | <input type="checkbox"/>                      | <input type="checkbox"/>  | <input type="checkbox"/>      |
| I feel intense physiological reactions (shocks, sweating, dizziness, shortness of breath, insomnia, etc.) related to the current crisis situation | <input type="checkbox"/>    | <input type="checkbox"/>                      | <input type="checkbox"/>  | <input type="checkbox"/>      |
| I feel on permanent alert. I believe that my reactions now put other patients, my colleagues or myself at risk                                    | <input type="checkbox"/>    | <input type="checkbox"/>                      | <input type="checkbox"/>  | <input type="checkbox"/>      |
| Worrying about not getting sick causes me a strain that's hard to bear                                                                            | <input type="checkbox"/>    | <input type="checkbox"/>                      | <input type="checkbox"/>  | <input type="checkbox"/>      |
| I'm afraid I'm going to infect my family                                                                                                          | <input type="checkbox"/>    | <input type="checkbox"/>                      | <input type="checkbox"/>  | <input type="checkbox"/>      |
| I have difficulty empathizing with patients' suffering or connecting with their situation (emotional distancing, emotional anesthesia)            | <input type="checkbox"/>    | <input type="checkbox"/>                      | <input type="checkbox"/>  | <input type="checkbox"/>      |

STROBE Statement—Checklist of items that should be included in reports of *cross-sectional studies*

|                              | Item No                                                                            | Recommendation                                                                                                                                                                                    | Page No      |
|------------------------------|------------------------------------------------------------------------------------|---------------------------------------------------------------------------------------------------------------------------------------------------------------------------------------------------|--------------|
| <b>Title and abstract</b>    | 1                                                                                  | (a) Indicate the study's design with a commonly used term in the title or the abstract                                                                                                            | 1-2          |
|                              |                                                                                    | (b) Provide in the abstract an informative and balanced summary of what was done and what was found                                                                                               | 2            |
| <b>Introduction</b>          |                                                                                    |                                                                                                                                                                                                   |              |
| Background/rationale         | 2                                                                                  | Explain the scientific background and rationale for the investigation being reported                                                                                                              | 4-5          |
| Objectives                   | 3                                                                                  | State specific objectives, including any prespecified hypotheses                                                                                                                                  | 5            |
| <b>Methods</b>               |                                                                                    |                                                                                                                                                                                                   |              |
| Study design                 | 4                                                                                  | Present key elements of study design early in the paper                                                                                                                                           | 5            |
| Setting                      | 5                                                                                  | Describe the setting, locations, and relevant dates, including periods of recruitment, exposure, follow-up, and data collection                                                                   | 5-6          |
| Participants                 | 6                                                                                  | (a) Give the eligibility criteria, and the sources and methods of selection of participants                                                                                                       | 6            |
| Variables                    | 7                                                                                  | Clearly define all outcomes, exposures, predictors, potential confounders, and effect modifiers. Give diagnostic criteria, if applicable                                                          | 5            |
| Data sources/<br>measurement | 8*                                                                                 | For each variable of interest, give sources of data and details of methods of assessment (measurement). Describe comparability of assessment methods if there is more than one group              | 5            |
| Bias                         | 9                                                                                  | Describe any efforts to address potential sources of bias                                                                                                                                         | -            |
| Study size                   | 10                                                                                 | Explain how the study size was arrived at                                                                                                                                                         | 5, 7         |
| Quantitative variables       | 11                                                                                 | Explain how quantitative variables were handled in the analyses. If applicable, describe which groupings were chosen and why                                                                      | 6-7          |
| Statistical methods          | 12                                                                                 | (a) Describe all statistical methods, including those used to control for confounding                                                                                                             | 7            |
|                              |                                                                                    | (b) Describe any methods used to examine subgroups and interactions                                                                                                                               | 6-7          |
|                              | (c) Explain how missing data were addressed                                        | -                                                                                                                                                                                                 |              |
|                              | (d) If applicable, describe analytical methods taking account of sampling strategy | 6-7                                                                                                                                                                                               |              |
|                              | (e) Describe any sensitivity analyses                                              | -                                                                                                                                                                                                 |              |
| <b>Results</b>               |                                                                                    |                                                                                                                                                                                                   |              |
| Participants                 | 13*                                                                                | (a) Report numbers of individuals at each stage of study—eg numbers potentially eligible, examined for eligibility, confirmed eligible, included in the study, completing follow-up, and analysed | 7            |
|                              |                                                                                    | (b) Give reasons for non-participation at each stage                                                                                                                                              | -            |
|                              |                                                                                    | (c) Consider use of a flow diagram                                                                                                                                                                | -            |
| Descriptive data             | 14*                                                                                | (a) Give characteristics of study participants (eg demographic, clinical, social) and information on exposures and potential confounders                                                          | 7            |
|                              |                                                                                    | (b) Indicate number of participants with missing data for each variable of interest                                                                                                               | -            |
| Outcome data                 | 15*                                                                                | Report numbers of outcome events or summary measures                                                                                                                                              | 7-8<br>15-17 |

|    |                          |    |                                                                                                                                                                                                              |
|----|--------------------------|----|--------------------------------------------------------------------------------------------------------------------------------------------------------------------------------------------------------------|
| 1  |                          |    |                                                                                                                                                                                                              |
| 2  | Main results             | 16 | (a) Give unadjusted estimates and, if applicable, confounder-adjusted estimates and their precision (eg, 95% confidence interval). Make clear which confounders were adjusted for and why they were included |
| 3  |                          |    | 7-8                                                                                                                                                                                                          |
| 4  |                          |    | 15-17                                                                                                                                                                                                        |
| 5  |                          |    |                                                                                                                                                                                                              |
| 6  |                          |    | (b) Report category boundaries when continuous variables were categorized                                                                                                                                    |
| 7  |                          |    | 7-8                                                                                                                                                                                                          |
| 8  |                          |    | 15                                                                                                                                                                                                           |
| 9  |                          |    | (c) If relevant, consider translating estimates of relative risk into absolute risk for a meaningful time period                                                                                             |
| 10 |                          |    | -                                                                                                                                                                                                            |
| 11 | Other analyses           | 17 | Report other analyses done—eg analyses of subgroups and interactions, and sensitivity analyses                                                                                                               |
| 12 |                          |    | -                                                                                                                                                                                                            |
| 13 | <b>Discussion</b>        |    |                                                                                                                                                                                                              |
| 14 | Key results              | 18 | Summarise key results with reference to study objectives                                                                                                                                                     |
| 15 |                          |    | 9                                                                                                                                                                                                            |
| 16 | Limitations              | 19 | Discuss limitations of the study, taking into account sources of potential bias or imprecision. Discuss both direction and magnitude of any potential bias                                                   |
| 17 |                          |    | 10-11                                                                                                                                                                                                        |
| 18 |                          |    |                                                                                                                                                                                                              |
| 19 | Interpretation           | 20 | Give a cautious overall interpretation of results considering objectives, limitations, multiplicity of analyses, results from similar studies, and other relevant evidence                                   |
| 20 |                          |    | 9-10                                                                                                                                                                                                         |
| 21 |                          |    |                                                                                                                                                                                                              |
| 22 | Generalisability         | 21 | Discuss the generalisability (external validity) of the study results                                                                                                                                        |
| 23 |                          |    | 10-11                                                                                                                                                                                                        |
| 24 | <b>Other information</b> |    |                                                                                                                                                                                                              |
| 25 | Funding                  | 22 | Give the source of funding and the role of the funders for the present study and, if applicable, for the original study on which the present article is based                                                |
| 26 |                          |    | 3                                                                                                                                                                                                            |
| 27 |                          |    |                                                                                                                                                                                                              |
| 28 |                          |    |                                                                                                                                                                                                              |
| 29 |                          |    |                                                                                                                                                                                                              |
| 30 |                          |    |                                                                                                                                                                                                              |

\*Give information separately for exposed and unexposed groups.

**Note:** An Explanation and Elaboration article discusses each checklist item and gives methodological background and published examples of transparent reporting. The STROBE checklist is best used in conjunction with this article (freely available on the Web sites of PLoS Medicine at <http://www.plosmedicine.org/>, Annals of Internal Medicine at <http://www.annals.org/>, and Epidemiology at <http://www.epidem.com/>). Information on the STROBE Initiative is available at [www.strobe-statement.org](http://www.strobe-statement.org).

# BMJ Open

## Acute Stress of the Healthcare Workforce during the COVID-19 pandemic evolution. A cross-sectional study in Spain

|                                 |                                                                                                                                                                                                                                                                                                                                                                                                                                                                                                                                                                                                                                                                                                                                                                                                                                                |
|---------------------------------|------------------------------------------------------------------------------------------------------------------------------------------------------------------------------------------------------------------------------------------------------------------------------------------------------------------------------------------------------------------------------------------------------------------------------------------------------------------------------------------------------------------------------------------------------------------------------------------------------------------------------------------------------------------------------------------------------------------------------------------------------------------------------------------------------------------------------------------------|
| Journal:                        | <i>BMJ Open</i>                                                                                                                                                                                                                                                                                                                                                                                                                                                                                                                                                                                                                                                                                                                                                                                                                                |
| Manuscript ID                   | bmjopen-2020-042555.R2                                                                                                                                                                                                                                                                                                                                                                                                                                                                                                                                                                                                                                                                                                                                                                                                                         |
| Article Type:                   | Original research                                                                                                                                                                                                                                                                                                                                                                                                                                                                                                                                                                                                                                                                                                                                                                                                                              |
| Date Submitted by the Author:   | 10-Oct-2020                                                                                                                                                                                                                                                                                                                                                                                                                                                                                                                                                                                                                                                                                                                                                                                                                                    |
| Complete List of Authors:       | Mira, José ; Miguel Hernandez University of Elche, Health Psychology; Alicante-Sant Joan Health District, Carrillo, Irene; Miguel Hernandez University of Elche, Health Psychology; FISABIO, Guilbert, Mercedes; Miguel Hernandez University of Elche, Health Psychology<br>Mula, Aurora; Foundation for the Promotion of Health and Biomedical Research of Valencia Region (FISABIO)<br>Martin, Jimmy; Foundation for the Promotion of Health and Biomedical Research of Valencia Region (FISABIO)<br>Pérez-Jover, M <sup>a</sup> Virtudes; Miguel Hernandez University of Elche, Health Psychology<br>Vicente, M <sup>a</sup> Asunción ; Miguel Hernandez University of Elche, Department of Systems Engineering and Automation<br>Fernández , César; Miguel Hernandez University of Elche, Department of Systems Engineering and Automation |
| <b>Primary Subject Heading</b>: | Health services research                                                                                                                                                                                                                                                                                                                                                                                                                                                                                                                                                                                                                                                                                                                                                                                                                       |
| Secondary Subject Heading:      | Mental health, Public health, Occupational and environmental medicine, Health policy                                                                                                                                                                                                                                                                                                                                                                                                                                                                                                                                                                                                                                                                                                                                                           |
| Keywords:                       | Health policy < HEALTH SERVICES ADMINISTRATION & MANAGEMENT, Organisation of health services < HEALTH SERVICES ADMINISTRATION & MANAGEMENT, Quality in health care < HEALTH SERVICES ADMINISTRATION & MANAGEMENT, Anxiety disorders < PSYCHIATRY, Depression & mood disorders < PSYCHIATRY, PUBLIC HEALTH                                                                                                                                                                                                                                                                                                                                                                                                                                                                                                                                      |
|                                 |                                                                                                                                                                                                                                                                                                                                                                                                                                                                                                                                                                                                                                                                                                                                                                                                                                                |

SCHOLARONE™  
Manuscripts

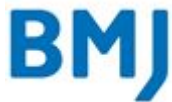

I, the Submitting Author has the right to grant and does grant on behalf of all authors of the Work (as defined in the below author licence), an exclusive licence and/or a non-exclusive licence for contributions from authors who are: i) UK Crown employees; ii) where BMJ has agreed a CC-BY licence shall apply, and/or iii) in accordance with the terms applicable for US Federal Government officers or employees acting as part of their official duties; on a worldwide, perpetual, irrevocable, royalty-free basis to BMJ Publishing Group Ltd ("BMJ") its licensees and where the relevant Journal is co-owned by BMJ to the co-owners of the Journal, to publish the Work in this journal and any other BMJ products and to exploit all rights, as set out in our [licence](#).

The Submitting Author accepts and understands that any supply made under these terms is made by BMJ to the Submitting Author unless you are acting as an employee on behalf of your employer or a postgraduate student of an affiliated institution which is paying any applicable article publishing charge ("APC") for Open Access articles. Where the Submitting Author wishes to make the Work available on an Open Access basis (and intends to pay the relevant APC), the terms of reuse of such Open Access shall be governed by a Creative Commons licence – details of these licences and which [Creative Commons](#) licence will apply to this Work are set out in our licence referred to above.

Other than as permitted in any relevant BMJ Author's Self Archiving Policies, I confirm this Work has not been accepted for publication elsewhere, is not being considered for publication elsewhere and does not duplicate material already published. I confirm all authors consent to publication of this Work and authorise the granting of this licence.



1  
2  
3  
4 **Acute Stress of the Healthcare Workforce during the COVID-19 pandemic evolution. A**  
5  
6 **cross-sectional study in Spain**  
7

8  
9 José Joaquín Mira<sup>1,2\*</sup>, Irene Carrillo<sup>2,3</sup>, Mercedes Guilabert<sup>2</sup>, Aurora Mula<sup>3</sup>, Jimmy Martin-  
10  
11 Delgado<sup>3</sup>, María Virtudes Pérez-Pérez<sup>2</sup>, María Asunción Vicente<sup>4</sup>, César Fernández<sup>4</sup> on  
12  
13 behalf of SARS-CoV-2 Second Victim Study Group†

14  
15  
16  
17 **\* Corresponding author:** José Joaquín Mira; Postal address: Avenida de la Universidad,  
18  
19 s/n, 03202 Elche, Alicante (Spain); e-mail: jose.mira@umh.es; Telephone: +34  
20  
21 966658984  
22

23  
24  
25 <sup>1</sup> Alicante-Sant Joan Health District, Alicante, Spain.

26  
27 <sup>2</sup> Department of Health Psychology, Miguel Hernández University, Elche, Spain.

28  
29  
30 <sup>3</sup> Foundation for the Promotion of Health and Biomedical Research of Valencia Region  
31  
32 (FISABIO), San Juan de Alicante, Spain.

33  
34  
35 <sup>4</sup> Department of Systems Engineering and Automation, Miguel Hernández University,  
36  
37 Elche, Spain.

38  
39  
40 † SARS-CoV-2 Second Victim Study Group: Ángel Cobos-Vargas, Olga Beatriz  
41  
42 Martínez-García (Hospital Universitario Clínico San Cecilio de Granada, Andalucía,  
43  
44 Spain), M<sup>a</sup> José Bueno-Domínguez (Grup SAGESSA, Reus, Spain), María Pilar Astier-  
45  
46 Peña (Centro de Salud “La Jota”, Zaragoza, Spain), Pastora Pérez-Pérez (Sociedad  
47  
48 Española de Calidad Asistencial, Spain), Matilde Lahera-Martín, Carmen Silvestre-  
49  
50 Busto (Servicio Navarro de Salud-Osasunbidea), Susana Lorenzo-Martínez (Hospital  
51  
52 Universitario Fundación Alcorcón, Madrid, Spain), Ascensión Sánchez-Martínez  
53  
54 (Hospital General Universitario Reina Sofía, Murcia, Spain), Bárbara Marco-Gómez,  
55  
56 Cristina Abad-Bouzán (Zona de Salud de Calatayud, Zaragoza, Spain), Carlos Aibar-  
57  
58  
59  
60

1  
2  
3 Remón (Hospital Clínico Universitario Lozano Blesa, Zaragoza), and Jesús María  
4  
5  
6 Aranaz-Andrés (Hospital Universitario Ramón y Cajal).  
7  
8  
9  
10

11 **Keywords:** COVID-19, healthcare professionals, psychological impact, acute stress,  
12  
13  
14 mental health, hospital, primary care  
15  
16

17 **Word count:** 4,146  
18  
19  
20  
21  
22  
23  
24  
25  
26  
27  
28  
29  
30  
31  
32  
33  
34  
35  
36  
37  
38  
39  
40  
41  
42  
43  
44  
45  
46  
47  
48  
49  
50  
51  
52  
53  
54  
55  
56  
57  
58  
59  
60

## Abstract

Objectives: To determine the volume of health professionals who suffered distress due to their care COVID-19 patients and to analyse the direction in which the response capacity of the professionals to face future waves of COVID-19 is evolving.

Design: A cross-sectional study.

Setting: Primary care and hospitals in Spain.

Participants: A non-randomised sample of 685 professionals (physicians, nurses, and other health staff).

Primary and secondary outcome measures: Frequency and intensity of stress responses measured by the Acute Stress of Health Professionals Caring COVID-19 Scale (EASE).

Variation of stress responses according to the number of deaths per day per territory and the evolutionary stage of the COVID-19 outbreak measured by the Kruskal Wallis and the Mann-Whitney U tests.

Results: The average score on the EASE scale was 11.1 (SD 6.7) out of 30. Among the participants, 44.2% presented a good emotional adjustment, 27.4% a tolerable level of distress, 23.9% medium-high emotional load, and 4.5% extreme acute stress. The stress responses were more intense in the most affected territories (12.1 vs 9.3,  $p=0.003$ ) and during the disillusionment phase (12.7 vs 8.5 impact, 10.2 heroic, and 9.8 honeymoon,  $p=0.000$ ).

Conclusions: The pandemic has affected the mental health of a significant proportion of health professionals which may reduce their resilience in the face of future waves of COVID-19. The institutional approaches to support the psychological needs of health professionals are essential to ensure optimal care considering these results.

## Strengths and limitations of this study

- This is an observational study to determine the volume of health professionals who present a high level of acute stress due to their care of patients with COVID-19 that may prevent them from carrying out their functions and to analyse the direction in which the response capacity of the professionals to face future waves of COVID-19 is evolving.
- This study used a scale specifically designed to assess acute stress of health professionals in direct contact with patients with COVID-19 (EASE Scale). This scale was previously validated.
- The study was conducted in Spain between March 18 and May 17, 2020, coinciding with the phase of greatest acceleration and subsequent flattening of the curve of the pandemic. In this study, it has been shown how the impact of the first outbreak has left the workforce emotionally drained, which could limit their ability to adequately play their role in the face of a possible outbreak.
- The scale was not administered to a random sample of the population, which could limit the generalizability of the results. Also, the scale may have reached different sectors of the study population unevenly due to the means used to distribute it.
- Only basic socio-demographic data were collected from health professionals. No comparisons among subgroups were calculated.

**Funding:** This research received no specific grant from any funding agency in the public, commercial or not-for-profit sectors.

1  
2  
3 **Competing interests:** None declared.  
4  
5

6 **Contributors:** JJM conceived and designed the work. JJM, IC, MG and MVPJ designed  
7  
8 the scale. MAV and CF developed the web and mobile app for the online administration  
9  
10 of the scale. JMD was responsible for the recruitment of participants. AM performed the  
11  
12 statistical analysis. IC and MG wrote a first draft of the manuscript, which was critically  
13  
14 reviewed for important intellectual content by JJM and JMD. All authors reviewed the  
15  
16 draft and approved the final version of the manuscript.  
17  
18  
19

20  
21 **Data sharing statement:** Data are available upon reasonable request.  
22  
23

24 **Ethical approval:** The study protocol was approved by the Research Committee of the  
25  
26 San Juan University Hospital in Alicante (8th of April 2020).  
27  
28  
29  
30  
31  
32  
33  
34  
35  
36  
37  
38  
39  
40  
41  
42  
43  
44  
45  
46  
47  
48  
49  
50  
51  
52  
53  
54  
55  
56  
57  
58  
59  
60

## Introduction

As of August, the 26th, COVID-19 pandemic has caused 819,830 deaths worldwide, 28,924 in Spain.[1] The number of professionals suffering from COVID-19 is substantial. In Spain, it accounts for 21% of the total number of people infected.[2]

Although the incidence of the pandemic has expanded differently, among the geographical areas of each country, most hospitals and health centres around the world have had to reorganise themselves to prioritise the care of COVID-19 patients, breaking with their usual work dynamics. In addition to this cause of work-related stress, there has been uncertainty in decision-making and a lack of resources to adequately treat patients and protect against possible contagion.[3-4] These circumstances have posed an additional risk to patient safety,[5] which may have adversely affected quality of health care.[6]

The intensity of compassion fatigue,[7] post-traumatic stress[8-9] and moral injury[10-11] observed among professionals can be expected to depend on the intensity of the spread of the pandemic, the resources available, and individual differences in stress response. Likewise, the extent of trauma experienced by professionals may also be influenced by factors that are not directly related to the health care response, such as family income and living situation, self-perceived health status, gender, personality traits, and coping styles.[12-13]

Results of studies quantifying the magnitude of the impact of COVID-19 patient care on the mental health of healthcare professionals have been published since the beginning of the pandemic. These findings have varied widely due to the heterogeneity of the methodologies and instruments used.[14]

1  
2  
3  
4 In the first studies, carried out at the beginning of February, 71.5% of healthcare  
5  
6 personnel, mostly from the province of Hubei in China, presented emotional  
7  
8 discomfort,[15] with frequent depressive symptoms (55.7%), anxiety responses  
9  
10 (44.7%)[16] and insomnia (78,4%).[17] In Italy, in the days before the peak of infections  
11  
12 (end of March), 49.4% of health professionals reported symptoms of post-traumatic  
13  
14 stress.[18] In Ecuador, in the second half of April, 90% of the medical and nursing staff  
15  
16 already presented moderate-severe burnout levels.[19] In Spain, after the first wave of  
17  
18 hospital care (April-May), 79.5% and 51.1% of health professionals presented symptoms  
19  
20 of anxiety and depression, respectively.[20] The expansion of the pandemic in each  
21  
22 territory has determined the magnitude of the emotional response. In China, sleep  
23  
24 disorders and psychological symptoms were more frequent among medical staff in  
25  
26 Wuhan than among staff in Ningbo.[21] A recent meta-analysis showed that depression,  
27  
28 anxiety and psychological distress were common responses in health professionals  
29  
30 during the COVID-19 outbreak, is more likely in women and in those who had direct  
31  
32 contact with positive cases of COVID-19.[22]

33  
34  
35  
36  
37  
38  
39  
40 The magnitude and exceptionality of the situation justify these results. The experience  
41  
42 of the crisis affects the entire staff and all professional levels, including support staff in  
43  
44 healthcare (IT, suppliers, janitors, etc.). The complete absence of impact in mental health  
45  
46 on the staff of health institutions would be difficult to explain. However, the most  
47  
48 important question is not the number of professionals who have been emotionally  
49  
50 affected as a result of their assistance services, a circumstance that has been  
51  
52 aggravated by this crisis but is inherent to the work they do, but rather how many have  
53  
54 not managed to recover, how their resilience is evolving or to what extent they can deal  
55  
56 with a possible new outbreak.  
57  
58  
59  
60

1  
2  
3 Most studies have analysed the emotional responses in a short period (approximately  
4 one week) coinciding with a specific stage of the crisis. However, studies on community  
5 coping with catastrophic situations have described that the psychological response  
6 evolves resulting in: impact phase, heroic (intensification of efforts), honeymoon  
7 (optimism), disillusionment (fatigue) and reconstruction (recovery pre-crisis levels).[23]  
8  
9 Therefore, it is expected that the effects of the pandemic on the psychological response  
10 of health professionals will vary as the pandemic evolves and affect their resilience to a  
11 new outbreak. At the moment, there are no known studies that have addressed the  
12 problem from this perspective.  
13  
14

15  
16 The objectives of this study were, first, to determine the volume of health professionals  
17 who, because of the impact of the COVID-19 pandemic on the healthcare environment  
18 in which they work, experienced an excessive level of acute stress that prevented them  
19 from performing their role. Second, to analyse the direction in which the levels of the  
20 emotional response of professionals evolve to face a new outbreak, considering the  
21 variation in the frequency and intensity of their stress reactions in the different phases of  
22 the pandemic and according to the areas with the greater or lesser impact of the  
23 pandemic.  
24  
25  
26  
27  
28  
29  
30  
31  
32  
33  
34  
35  
36  
37  
38  
39  
40  
41  
42  
43  
44  
45  
46  
47

## 48 **Methods**

49  
50 A cross-sectional observational study in a non-randomised sample of Spanish  
51 healthcare professionals was conducted. The study was designed to analyse two  
52 assumptions. Firstly, since the results yielded in studies conducted elsewhere involving  
53 healthcare workforce caring COVID-19 patients, it was expected that between 3% and  
54  
55  
56  
57  
58  
59  
60



1  
2  
3 10,5% [9, 13, 24] of the healthcare professionals present psychological distress, with it  
4  
5 being more severe as the pandemic becomes more intense. So, as seen in other studies,  
6  
7 in those territories most affected by the pandemic, the percentage of professionals with  
8  
9 emotional distress is expected to be higher.[21] Finally, since the impact of the pandemic  
10  
11 should be directly related to the distress experienced by professionals, it was expected  
12  
13 that there will be a cumulative effect whereby the percentage of professionals with high  
14  
15 levels of stress will be greater in the more advanced phases of the model of the  
16  
17 psychological response during a disaster.[23]  
18  
19  
20  
21  
22

23 The study was conducted in Spain between March 18 and May 17, 2020, coinciding with  
24  
25 the phase of greatest acceleration and subsequent flattening of the curve of the  
26  
27 pandemic. The study protocol was approved by the Research Committee of the San  
28  
29 Juan University Hospital in Alicante (8th of April 2020).  
30  
31  
32

### 33 *Variables and instrument*

34  
35

36 We used a scale specifically designed to assess acute stress of health professionals in  
37  
38 direct contact with COVID-19 patients (EASE Scale) (supplementary material). This  
39  
40 scale was previously validated, first, a pragmatic literature review of items assessing  
41  
42 acute stress in healthcare professionals was conducted for possible inclusion, also, the  
43  
44 most relevant sources of acute stress, pointed by the professional's experiences were  
45  
46 represented into 17 reactive items; this number was finally reduced to 10 items, once  
47  
48 participants considered their representativeness and comprehension. The instrument  
49  
50 was validated following COSMIN protocol involving 228 Spanish physicians, and nurses,  
51  
52 it is composed of 10 items to which responses are given using a 4-level Likert type scale  
53  
54 (0 = It is not happening to me, 1 = It happens to me in concrete situations, 2 = It often  
55  
56 happens to me and 3 = I am like this all the time). The total score on the scale can range  
57  
58  
59  
60

1  
2  
3 from 0 to 30 points, with greater scores being interpreted as higher levels of stress.  
4  
5 Reliability was calculated using OMEGA (0.87) and Cronbach's Alpha (0.85). The items  
6  
7 were grouped by Exploratory Factor Analysis into two factors that evaluate: affective  
8  
9 response and fears and anxiety, explaining 55% of the variance. Factor 1, referring to  
10  
11 the affective response, is composed of 6 items, so that the direct score on this factor  
12  
13 ranges from 0 to 18 points. The factor 2 that evaluates fears and anxiety is composed of  
14  
15 4 items and its minimum and maximum possible scores are 0 and 12 respectively. The  
16  
17 interpretability of the score ranges was established: 0-9 points (good emotional  
18  
19 adjustment), 10-14 points (emotional distress), 15-24 points (medium-high emotional  
20  
21 overload), >25 points (extreme acute stress) [25].  
22  
23  
24  
25  
26  
27

### 28 *Participants*

29  
30 Healthcare professionals from primary care centres and hospitals. At the time the study  
31  
32 was conducted, the entire public health system was involved in the care of COVID-19  
33  
34 patients. Care for patients suffering other pathologies was suspended except for  
35  
36 emergencies and those that could not be delayed, in other situations care was provided  
37  
38 by telephone. We determined a minimum sample size of 650 professionals, considering  
39  
40 a population of 392,667 health professionals (hospitals and primary care) [26], an effect  
41  
42 size of 0.20, a statistical power of 95% and a confidence level of 95%.  
43  
44  
45  
46  
47

### 48 *Patient and Public Involvement*

49  
50 Patients or the public were not involved in any phase of this study.  
51  
52

### 53 *Procedure*

54  
55 The diffusion of the scale and data gathering was done in a twofold way. First, the scale  
56  
57 was made accessible through a web-based resource repository created by the authors  
58  
59  
60

1  
2  
3 to reduce the impact of the SARS-CoV-2 pandemic on the psychological well-being of  
4 healthcare professionals.[27] These resources to cope with acute stress during the worst  
5 moments of the pandemic were disseminated through several Spanish scientific  
6 societies, social media, and specialized press news. Second, the scale was accessible  
7 through the mobile application BE+ against COVID[28-29] which was disseminated using  
8 the same means and by leaders of occupational health and hospital patient safety units.  
9  
10 The consenting procedure to participate in the study was inherent in the use of the  
11 website and app.  
12  
13  
14  
15  
16  
17  
18  
19  
20  
21  
22

### 23 Acute stress responses

24  
25 Scores on the scale equal to or higher than 15 points were considered the level of stress  
26 with the potential to limit the professional's optimal performance of his/her function or  
27 work activity.  
28  
29  
30  
31  
32

### 33 Pandemic extension and acute stress responses

34  
35 The results of the self-assessment using this scale were linked to the data on the  
36 evolution of the pandemic in Spain using the data published daily by the Spanish Health  
37 Ministry, considering both the differences in impact between territories and the temporal  
38 phases of its evolution.  
39  
40  
41  
42  
43  
44

45  
46 To determine the territories most and least affected by the pandemic on May 17th, 2020,  
47 the country was divided into two groups according to the number of deaths from COVID-  
48 19. The first group included Madrid, and Catalonia, with more than 5,000 deaths. The  
49 second group included Asturias, the Balearic Islands, the Canary Islands, Cantabria,  
50 Extremadura, La Rioja, Murcia, and Navarre with less than 500 deaths. To compare  
51 results on the EASE scale according to the territory, a sub-sample of 336 participants  
52  
53  
54  
55  
56  
57  
58  
59  
60

1  
2  
3 working in health institutions in the regions specified above was selected. The  
4  
5 comparison was made between the most and least affected territories.  
6  
7  
8  
9

#### 10 11 Acute stress during the outbreak evolution

12  
13  
14 To analyse acute stress during the pandemic, four moments of the evolution of the  
15 outbreak were determined according to the number of deaths per day: less than 500  
16 (03/18 - 03/25), between 600 and 900 (03/28 - 04/15), between 300 and 600 (04/16 -  
17 04/26) and less than 300 (04/27 - 05/17). The periods described corresponded to the  
18 phases of the community's psychological response to the pandemic: impact (awareness  
19 of the problem, less than 500 deaths/day), heroic (increased efforts to cope with the crisis  
20 and mitigate the impact, between 600 and 900 deaths/day), honeymoon (hope, between  
21 300 and 600 deaths/day) and disillusionment (accumulated fatigue, less than 300  
22 deaths/day). For the temporal definition of the phases, data on deaths per day were  
23 extracted from the dashboard of the Spanish Health Ministry.  
24  
25  
26  
27  
28  
29  
30  
31  
32  
33  
34  
35  
36  
37  
38

#### 39 *Statistical analysis*

40  
41 Descriptive and frequency analyses were performed. Mean scores on each factor were  
42 transformed to a 0-10 scale to allow comparison because the number of items was  
43 different on each factor. The Kruskal Wallis test and the Mann-Whitney U test were used  
44 to determine the differences in acute stress reactions according to the time of evolution  
45 of the pandemic and the degree to which the territory was affected, respectively. Also,  
46 responses on the Be+ against COVID app and the Website were compared. The  
47 comparative analyses of scores on the EASE scale were conducted item by item, by  
48  
49  
50  
51  
52  
53  
54  
55  
56  
57  
58  
59  
60

1  
2  
3 scale factors and overall score. The confidence interval used was 95%. Data coding and  
4  
5 analysis was performed using IBM SPSS Statistics software, version 25.  
6  
7  
8  
9  
10

## 11 **Results**

12  
13  
14 A total of 685 professionals responded. Of these, 28.6% (n=196) were doctors, 39%  
15  
16 (n=267) were nurses and 32.3% (n=222) were other healthcare staff (including advanced  
17  
18 technicians in nursing auxiliary care, radiodiagnosis, and clinical diagnostic laboratory).  
19  
20 A majority of them reported working in a hospital setting 81.9% (n=561), in primary care  
21  
22 8% (n=55) and in both care levels 10.1% (n=69). 40.4% worked in areas where the  
23  
24 pandemic had had a greater impact. Most of them worked in Madrid (37%), Valencia  
25  
26 (15.7%), Andalusia (14.1%) and Catalonia (3.3%).  
27  
28  
29

### 30 *Scores on the EASE scale*

31  
32  
33 The mean total score on the scale was 11.1 points (SD 6.7, 95% CI 10.6 - 11.6, range  
34  
35 0-30), with 23.9% (n=164) with a medium-high level of emotional load, and 4.5% (n=31)  
36  
37 showing an extreme level of acute stress. Scores between the emotional response factor  
38  
39 vs. the fear/anxiety factor no differences were observed, 3.6 (SD 2.4) vs. 3.8 (SD=2.5);  
40  
41 p=0.2 (score transformed into a scale of 0 to 10 points).  
42  
43  
44  
45  
46

47  
48 Three hundred and forty-one (49.8%) of the health professionals highlighted that they  
49  
50 had difficulties in being able to disconnect from work and 49% (n=335) expressed fear  
51  
52 of infecting their family once they returned home at the end of the working day. 23%  
53  
54 (n=157) expressed concerns about not falling ill and 17% (n=116) experienced difficulties  
55  
56 in empathizing with the suffering of the patients (Table 1).  
57  
58  
59  
60

1  
2  
3 Scores on the EASE scale were similar among the professional categories ( $p=0.46$ ).

4  
5 Only, differences were found between the scores for the statement related to maintaining  
6  
7  
8 emotional distance with people ( $p=0.03$ ). Nurses scored higher than doctors or others.  
9

10  
11 Differences were found in the scores, in the use of the two platforms Website vs Be+  
12  
13 against COVID to respond to the EASE scale (10.5; SD 6.3 vs 11.8; SD 7.1;  $p=0.008$ ).

14  
15 However, the use of the app was mostly employed by professionals from territories with  
16  
17 greater expansion of the pandemic 66% ( $n=206$ ) vs 21.1% ( $n=79$ ). 45.5% ( $n=312$ )  
18  
19 answered the questionnaire through the app and 54.5% ( $n=373$ ) through the website.  
20  
21

#### 22 23 *EASE scale scores in territories with a higher incidence rate*

24  
25 The average score on the EASE scale was higher (up to 30% more) in those territories  
26  
27 with a higher number of recorded deaths compared to those territories that had a lower  
28  
29 number (12.1 vs 9.3  $p=0.003$ ) (Table 2). Despite the different affection between  
30  
31 territories, there were aspects in which these differences were not observed, such as  
32  
33 completely losing the taste for things that previously produced tranquillity or well-being  
34  
35 ( $p=0.50$ ), feeling that people who required the help of the professional were being  
36  
37 neglected ( $p=0.37$ ), feeling emotionally blocked ( $p=0.37$ ) or having difficulties in  
38  
39 empathizing with the patients' suffering ( $p=0.93$ ).  
40  
41  
42  
43  
44

#### 45 46 *EASE scale scores according to the evolution of the pandemic and the different phases* 47 48 *of psychological response to the disaster*

49  
50  
51 The average scores on the EASE scale were higher in the disillusionment phase (April  
52  
53 27-May 17, 2020) compared to the first period defined as the impact or awareness phase  
54  
55 (March 18-March 25, 2020) (12.7 vs 8.5  $p<0.0001$ ) (Table 3).  
56  
57  
58  
59  
60

## Discussion

Acute stress was manifested mainly by the inability to disconnect from work and the fear of infecting loved ones. Losing empathy for the suffering of patients and fear of becoming ill are the statements that probably best discriminate against professionals whose condition prevents them from continuing with their care work. This study backs up what has been suggested in previous studies that approximately 5% of the healthcare professionals suffered an extreme level of acute stress as a consequence of caring COVID-19 patients [9, 13, 24]. Considering these results, the targets for the interventions designed to cope with distress due to the COVID-19 pandemic [30] must take in account that approximately a quarter of professionals could need support not to evolve towards situations of extreme acute stress.

### *Intense emotional responses in territories with a higher incidence rate*

This research suggests the level of acute stress experienced by Spanish professionals is higher as the damage from COVID-19 increases in patients. As expected, acute stress has been higher in those territories where the pandemic has had a greater impact in terms of the incidence of COVID-19 cases and deaths from this disease.

Those professionals working in territories where the pandemic has been particularly aggressive show more intense emotional responses in those elements related to thoughts, fears, and physiological reactions because of the situation they are living. This result has not been observed with the fact of being emotionally blocked to think and take decisions or with the difficulty to empathize with the suffering of patients, these emotional responses could be developed in later stages.[31]

1  
2  
3 Distress, therefore, appear to be associated with the pressures and demands caused by  
4  
5 the pandemic, although it has not been possible to determine whether increased  
6  
7 availability of resources or support programs might have alleviated their effects.  
8  
9

10  
11 *Intense emotional responses in the final phases of psychological response according to*  
12  
13 *the evolution of the pandemic*  
14  
15

16 The evolution observed in the stress response of professionals is largely in line with the  
17  
18 phases proposed by the psychological disaster response model.[23] The level of acute  
19  
20 stress manifested by professionals in the disillusionment phase is greater than the stress  
21  
22 experienced during the impact phase. This result confirms the expected outcome and is  
23  
24 suggesting that the capacity to deal with a new outbreak will be diminished if there is not  
25  
26 enough time between outbreaks to allow for recovery or if decisive action is not taken to  
27  
28 recover.  
29  
30  
31

32  
33 *Purpose- built measure*  
34  
35

36 This study used a scale specifically designed to discriminate between situations that  
37  
38 cause acute stress in the course of caring for COVID-19 patients, unlike other studies  
39  
40 that used scales to screen for symptoms of anxiety and depression.[15, 32-33] This scale  
41  
42 was based on the premise that the response to the consequences of the pandemic could  
43  
44 not leave professionals indifferent and that the sources of stress that could disable  
45  
46 professional duties would be quite different from those included in most instruments  
47  
48 designed for other purposes. This differential element must be considered when  
49  
50 interpreting the results, given that most of the studies that have so far evaluated the  
51  
52 psychological impact of the COVID-19 pandemic on health professionals have used  
53  
54 questionnaires that were validated under different conditions than the current ones. The  
55  
56  
57  
58  
59  
60



1  
2  
3 EASE scale has been sensitive to these changes, allowing the impact of the pandemic  
4  
5 on health professionals to be assessed[10-11] and it can be expected to be useful for  
6  
7 measuring the effects on emotional response and coping capacity if there is a  
8  
9 resurgence.  
10  
11

12  
13 This scale has reflected, above all, that they were unable to disconnect from work,  
14  
15 experienced irritability, anxiety, fear of infecting their families, and doubts about their  
16  
17 ability to make decisions in clinical practice. However, most of the scores reported by  
18  
19 health professionals were in the first and second range of the scale (mild level of  
20  
21 emotional distress). These data show that most professionals have not experienced,  
22  
23 according to the EASE scale scores, levels of extreme acute stress. This result suggests  
24  
25 that we must differentiate between the emotional impact that can be expected from the  
26  
27 stress of the crisis and that other emotional impact that prevents the responsibilities of  
28  
29 the profession from being carried out with the appropriate guarantees for patients. These  
30  
31 results confirm the existence of emotional discomfort in the staff, identifies in what this  
32  
33 discomfort translates to, and that only 1 out of 20 professionals have been emotionally  
34  
35 overwhelmed and with difficulties in carrying out their work.  
36  
37  
38  
39  
40  
41

42  
43 In the case of a new outbreak, the data suggest that to determine the level of impact on  
44  
45 the mental health of health professionals, the following should be considered: employing  
46  
47 instruments used to identify the sources of stress or to measure acute stress associated  
48  
49 with the care of COVID-19 patients rather than instruments designed for screening  
50  
51 anxiety or depression; measurements should consider the care pressure faced by  
52  
53 professionals and the evolution of this pressure over time because that is when it  
54  
55 decreases when the intensity of acute stress increases.  
56  
57  
58  
59

60 *Applications of this study*

1  
2  
3 The SARS-CoV-2 pandemic has caused an unprecedented health crisis that has shaken  
4 the foundations of health systems around the world, requiring responses that were not  
5 always prepared. One reflection is the number of professionals infected. In Spain, as of  
6 18 June, 52,036 health professionals had contracted the COVID-19 disease and just  
7 over 13% of those hospitalized required admission to the Intensive Care Unit.[2] This  
8 fact, added to the emotional response to the health crisis, has led to their being identified  
9 as the second victim of SARS-CoV-2.  
10  
11  
12  
13  
14  
15  
16  
17  
18  
19

20 The term "second victim"[34] applied to healthcare personnel has been used over the  
21 last two decades to refer to the emotional distress experienced by healthcare  
22 professionals when they suspect that they have been involved in a safety incident that  
23 has resulted in harm to the patient or when they observe that the patient in their care is  
24 not developing properly and their decisions and actions are being questioned. In the  
25 current scenario, where the healthcare professional has not had the appropriate means  
26 to cure and care for patients, we extend the concept of the second victim to refer to any  
27 healthcare or support professional involved in the care of people affected by COVID-19,  
28 who presents acute stress responses when continuously exposed to an extreme  
29 situation caused by the combination of a series of critical factors, including social alarm,  
30 oversaturation of services, scarcity of resources and the poor evolution of the patients  
31 under their care.  
32  
33  
34  
35  
36  
37  
38  
39  
40  
41  
42  
43  
44  
45  
46  
47  
48  
49

50 The response to the emotional and psychological needs that the staff of health  
51 institutions is experiencing as a result of this situation is justified not only on ethical  
52 grounds but also to ensure quality care and patient safety.[35] Precisely the recovery of  
53 these systems after the COVID-19 crisis that requires restoring the working morale and  
54 welfare of health professionals and strengthening their capacity for resilience.[36] Some  
55  
56  
57  
58  
59  
60

1  
2  
3 authors suggest adopting measures based on the social support provided by co-workers  
4  
5 or peers.[37-38] Digital initiatives have also been developed in the form of broader  
6  
7 programmes that integrate social support as one of their resources to mitigate the impact  
8  
9 of COVID-19 on health professionals.[10, 30]  
10  
11  
12

13  
14 Despite the recent emergence of tools to measure the effects of the pandemic on mental  
15  
16 health and behaviour in the general population,[39-41] there are still no specific  
17  
18 measures designed and validated for evaluation in health professionals. As far as we  
19  
20 are aware, this study is the first to explore the emotional distress caused by the COVID-  
21  
22 19 health crisis and one of the first to use a specifically validated measure for this  
23  
24 purpose.  
25  
26

### 27 28 *Limitations* 29

30  
31 This study was conducted using a scale that was not administered to a random sample  
32  
33 of the population which could limit the generalizability of the findings. During the  
34  
35 pandemic, depending on the care needs of the territories, primary care professionals  
36  
37 moved to work in hospitals (e.g., field hospitals). The scale may have reached different  
38  
39 sectors of the study population unevenly due to the media used. Access to the scale by  
40  
41 participants via their well-being repository may have overrepresented the response of  
42  
43 professionals who were feeling more distressed. Those days the entire health system  
44  
45 was dedicated to the care of COVID-19 patients. No specific procedure was used to  
46  
47 confirm that respondents to the scale were working caring COVID-19 patients at the time  
48  
49 of the outbreak, despite prior instructions requiring this. The motivation of respondents  
50  
51 and those who chose not to respond could have biased the sample and therefore the  
52  
53 results. The study looked at a limited number of sociodemographic variables with the  
54  
55 intention that participants would feel that their privacy was guaranteed when completing  
56  
57  
58  
59  
60

1  
2  
3 the scale. This decision was made because, during the first wave of COVID-19 in Spain,  
4  
5 most healthcare professionals were reluctant to receive help in managing their acute  
6  
7 stress. Consequently, the collection of some sociodemographic data (such as gender or  
8  
9 age) could have been a barrier for them to self-assess their stress levels due to the fear  
10  
11 of being identified. At that time, to give emotional support to our healthcare workforce  
12  
13 was prioritized. These precautions in data collection significantly limited the possibilities  
14  
15 of national and international comparative analyses of stress responses by groups (such  
16  
17 as sex, age, experience, etc.). It also prevented intrasubject comparisons at different  
18  
19 times of the crisis. Despite these limitations, the results obtained are in line with those  
20  
21 found in other studies.[9, 13, 24] The comparative analyses between the most and least  
22  
23 affected territories only took into account the number of deaths/day without controlling  
24  
25 for other variables that could be influencing the impact of the pandemic on the health  
26  
27 centre and its professionals, such as access to equipment, human resources, among  
28  
29 others. it should be considered that during the pandemic, there was an increase in  
30  
31 personnel and resources throughout the health system in response to an emergency that  
32  
33 could not be quantified. The training of this staff to perform their new function could not  
34  
35 be considered which could affect their stress levels.  
36  
37  
38  
39  
40  
41  
42  
43

#### 44 *Conclusion*

45  
46  
47 Over time, we have become more scientifically and technically prepared to deal with  
48  
49 COVID-19 and have learned multiple lessons on how to best deal with this crisis, but the  
50  
51 impact of the first outbreak has left the workforce emotionally drained, which could limit  
52  
53 their ability to properly perform their role in the face of a possible outbreak. Consequently,  
54  
55 health institutions in the process of workforce recovery must incorporate measures to  
56  
57 restore the well-being and work morale of healthcare professionals. This study  
58  
59  
60

demonstrates this, confirming that emotional difficulties begin to appear at the end of the most critical phases of the pandemic.

## References

1. Johns Hopkins University & Medicine. Coronavirus Resource Center. COVID-19 Dashboard by the Center for Systems Science and Engineering (CSSE) at Johns Hopkins University (JHU) [Internet, 08.07.2020]. Available from: <https://coronavirus.jhu.edu/map.html>
2. Corporación Radio y Televisión Española (rtve). Los profesionales sanitarios contagiados de COVID-19 superan los 52.000, 81 en la última semana [Internet, 06.19.2020]. Available from: <https://www.rtve.es/noticias/20200619/profesionales-sanitarios-contagiados-covid-19-superan-50000/2014047.shtml>
3. Binkley CE, Kemp DS. Ethical Rationing of Personal Protective Equipment to Minimize Moral Residue During the COVID-19 Pandemic. *J Am Coll Surg*. 2020;230:1111-3. doi: 10.1016/j.jamcollsurg.2020.03.031
4. Steinberg E, Balakrishna A, Habboushe J, *et al*. Calculated Decisions: COVID-19 Calculators During Extreme Resource-Limited Situations. *Emerg Med Pract* 2020;22:CD1-5.
5. Hall LH, Johnson J, Watt I, *et al*. Healthcare Staff Wellbeing, Burnout, and Patient Safety: A Systematic Review. *PLoS One* 2016;11:e0159015.
6. Wallace JE, Lemaire JB, Ghali WA. Physician Wellness: A Missing Quality Indicator. *Lancet* 2009;374:1714:21. doi: 10.1016/S0140-6736(09)61424-0

- 1  
2  
3  
4 7. Alharbi J, Jackson D, Usher K. The potential for COVID-19 to contribute to compassion  
5  
6 fatigue in critical care nurses. *J Clin Nurs* 2020 [online ahead of print]. doi:  
7  
8 10.1111/jocn.15314.  
9  
10  
11 8. Restauri N, Sheridan AD. Burnout and Posttraumatic Stress Disorder in the  
12  
13 Coronavirus Disease 2019 (COVID-19) Pandemic: Intersection, Impact, and  
14  
15 Interventions. *J Am Coll Radiol* 2020 [online ahead of print]. doi:  
16  
17 10.1016/j.jacr.2020.05.021  
18  
19  
20  
21 9. Huang JZ, Han MF, Luo TD, *et al*. Mental Health Survey of Medical Staff in a Tertiary  
22  
23 Infectious Disease Hospital for COVID-19. *Zhonghua Lao Dong Wei Sheng Zhi Ye Bing*  
24  
25 *Za Zhi* 2020;**38**:192-5. doi: 10.3760/cma.j.cn121094-20200219-00063  
26  
27  
28  
29 10. Williamson V, Murphy D, Greenberg N. COVID-19 and experiences of moral injury  
30  
31 in front-line key workers. *Occup Med (Lond)* 2020:kqaa052. doi:  
32  
33 10.1093/occmed/kqaa052  
34  
35  
36  
37 11. Williams RD, Brundage JA, Williams EB. Moral Injury in Times of COVID-19. *Health*  
38  
39 *Serv Psychol* 2020:1-5. doi: 10.1007/s42843-020-00011-4  
40  
41  
42 12. DiGangi JA, Gomez D, Mendoza L, *et al*. Pretrauma risk factors for posttraumatic  
43  
44 stress disorder: A systematic review of the literature. *Clin Psychol Rev* 2013;**33**:728-44.  
45  
46 doi: 10.1016/j.cpr.2013.05.002  
47  
48  
49  
50 13. Guo J, Wu P, Tian D, *et al*. Post-traumatic Stress Disorder among adult survivors of  
51  
52 the Wenchuan Earthquake in China: A repeated cross-sectional study. *J Anxiety Disord*  
53  
54 2014;**28**:75-82. doi: 10.1016/j.janxdis.2013.12.001  
55  
56  
57  
58 14. Pappa S, Ntella V, Giannakas T, *et al*. Prevalence of depression, anxiety, and  
59  
60 insomnia among healthcare workers during the COVID-19 pandemic: A systematic

1  
2  
3 review and meta-analysis. *Brain Behav Immun* 2020; S0889-1591(20)30845-X.  
4  
5  
6 doi:10.1016/j.bbi.2020.05.026  
7

8  
9 15. Lai J, Ma S, Wang Y, *et al.* Factors Associated With Mental Health Outcomes Among  
10  
11 Health Care Workers Exposed to Coronavirus Disease 2019. *JAMA Netw Open*  
12  
13 2020;**3**:e203976. doi:10.1001/jamanetworkopen.2020.3976  
14  
15

16  
17 16. Zhang C, Yang L, Liu S, *et al.* Survey of Insomnia and Related Social Psychological  
18  
19 Factors Among Medical Staff Involved in the 2019 Novel Coronavirus Disease Outbreak.  
20  
21 *Front Psychiatry* 2020;**11**:306. doi: 10.3389/fpsyt.2020.00306  
22  
23

24  
25 17. Qi J, Xu J, Li BZ, *et al.* The evaluation of sleep disturbances for Chinese frontline  
26  
27 medical workers under the outbreak of COVID-19. *Sleep Med* 2020;**72**:1-4. doi:  
28  
29 10.1016/j.sleep.2020.05.023  
30

31  
32 18. Rossi R, Socci V, Pacitti F, *et al.* Mental Health Outcomes Among Frontline and  
33  
34 Second-Line Health Care Workers During the Coronavirus Disease 2019 (COVID-19)  
35  
36 Pandemic in Italy. *JAMA Netw Open* 2020;**3**:e2010185.  
37  
38 doi:10.1001/jamanetworkopen.2020.10185  
39  
40

41  
42 19. Vinueza Veloz AF, Aldaz Pachacama NR, Mera Segovia CM, *et al.* Síndrome de  
43  
44 Burnout en médicos/as y enfermeros/as ecuatorianos durante la pandemia de COVID-

45  
46 19. 2020 pre-print Scielo. Available from:  
47  
48 [https://www.google.com/url?sa=t&rct=j&q=&esrc=s&source=web&cd=&ved=2ahUKEwi](https://www.google.com/url?sa=t&rct=j&q=&esrc=s&source=web&cd=&ved=2ahUKEwiH8bCK5ZXqAhXTiFwKHFTxDmMQFJAAegQIAhAB&url=https%3A%2F%2Fpreprints.scielo.org%2Findex.php%2Fscielo%2Fpreprint%2Fdownload%2F708%2F958%2F988&u)  
49  
50 [H8bCK5ZXqAhXTiFwKHFTxDmMQFJAAegQIAhAB&url=https%3A%2F%2Fpreprints.sc](https://www.google.com/url?sa=t&rct=j&q=&esrc=s&source=web&cd=&ved=2ahUKEwiH8bCK5ZXqAhXTiFwKHFTxDmMQFJAAegQIAhAB&url=https%3A%2F%2Fpreprints.sc)  
51  
52 [ielo.org%2Findex.php%2Fscielo%2Fpreprint%2Fdownload%2F708%2F958%2F988&u](https://www.google.com/url?sa=t&rct=j&q=&esrc=s&source=web&cd=&ved=2ahUKEwiH8bCK5ZXqAhXTiFwKHFTxDmMQFJAAegQIAhAB&url=https%3A%2F%2Fpreprints.sc)  
53  
54 [sg=AOvVaw3PSHAVyRBM1rCJu6IL\\_xWI](https://www.google.com/url?sa=t&rct=j&q=&esrc=s&source=web&cd=&ved=2ahUKEwiH8bCK5ZXqAhXTiFwKHFTxDmMQFJAAegQIAhAB&url=https%3A%2F%2Fpreprints.sc)  
55  
56  
57  
58  
59  
60

- 1  
2  
3 20. Universidad Autónoma de Madrid. El 79,5% de los sanitarios sufren ansiedad y el  
4 40% se siente emocionalmente agotado tras la primera oleada de atención hospitalaria  
5 por Covid-19 [press statement]. Available from: [https://www.ucm.es/file/estres-](https://www.ucm.es/file/estres-sanitarios-mayo-2020)  
6  
7 sanitarios-mayo-2020  
8  
9  
10  
11  
12  
13 21. Li X, Yu H, Bian G, *et al.* Prevalence, risk factors, and clinical correlates of insomnia  
14 in volunteer and at home medical staff during the COVID-19. *Brain Behav Immun*  
15 2020;**87**:140-41. doi:10.1016/j.bbi.2020.05.008  
16  
17  
18  
19  
20  
21 22. Chou R, Dana T, Buckley DI, *et al.* Epidemiology of and Risk Factors for Coronavirus  
22 Infection in Health Care Workers: A Living Rapid Review. *Ann Intern Med* 2020;**173**:120-  
23 36. doi:10.7326/M20-1632  
24  
25  
26  
27  
28  
29 23. Myers D, Zunin L. Phases of disaster, in DeWolfe D (Ed.), Training Manual for Mental  
30 Health and Human Service Workers in Major Disasters. Washington, DC: US  
31 Government Printing Office; 2000.  
32  
33  
34  
35  
36 24. Lu W, Wang H, Lin Y, *et al.* Psychological status of medical workforce during the  
37 COVID-19 pandemic: A cross-sectional study. *Psychiatry Res* 2020;**288**:112936. doi:  
38 10.1016/j.psychres.2020.112936  
39  
40  
41  
42  
43  
44 25. Mira JJ, Cobos-Vargas A, Martínez-García O, *et al.* The Acute Stress Scale in  
45 healthcare professionals caring for patients with COVID-19. Validation study. PREPRINT  
46 (Version 1, 16 July 2020). *Research Square* 2020. doi: 10.21203/rs.3.rs-39710/v1  
47  
48  
49  
50  
51  
52 26. Ministerio de Sanidad, Consumo y Bienestar Social. Portal Estadístico, Área de  
53 Inteligencia de Gestión. Consulta Interactiva del Sistema Nacional de Salud [Internet].  
54 2018. Available from:



1  
2  
3 <https://pestadistico.inteligenciadegestion.mscbs.es/publicoSNS/Comun/DefaultPublico.aspx>

4  
5  
6  
7  
8  
9 27. SARS-CoV-2 Second Victim Study Group. BE+ against COVID. SARS-CoV-2  
10 (COVID-19) second victims [Internet]. Available from:  
11 <https://secondvictimscovid19.umh.es/p/resource-09.html>

12  
13  
14  
15  
16 28. BE+ against COVID, Google Play [Internet, mobile app]. Available from:  
17 <https://play.google.com/store/apps/details?id=com.appandabout.defusing>

18  
19 29. BE+ against COVID, App Store [Internet, mobile app]. Available from:  
20 <https://apps.apple.com/es/app/ser-positivo-contra-covid/id1512478131>

21  
22  
23  
24  
25  
26  
27 30. Blake H, Bermingham F, Johson G, *et al.* Mitigating the Psychological Impact of  
28 COVID-19 on Healthcare Workers: A Digital Learning Package. *Int J Environ Res Public*  
29 *Health*. 2020;**17**:2997. doi: 10.3390/ijerph17092997

30  
31  
32  
33  
34  
35 31. Kadhum M, Farrell S, Hussain R, *et al.* Mental wellbeing in surgical trainees:  
36 implications for the post-COVID-19 era. *Br J Surg* 2020;**107**:e264. doi:  
37 10.1002/bjs.11726

38  
39  
40  
41  
42 32. Liu CY, Yang YZ, Zhang XM, *et al.* The prevalence and influencing factors in anxiety  
43 in medical workers fighting COVID-19 in China: a cross-sectional survey. *Epidemiol*  
44 *Infect* 2020;**148**:e98. doi:10.1017/S0950268820001107

45  
46  
47  
48  
49  
50 33. Wu Y, Wang J, Luo C, *et al.* A Comparison of Burnout Frequency Among Oncology  
51 Physicians and Nurses Working on the Frontline and Usual Wards During the COVID-  
52 19 Epidemic in Wuhan, China. *J Pain Symptom Manage* 2020;**60**:e60-5.  
53  
54  
55  
56  
57  
58  
59  
60  
doi:10.1016/j.jpainsymman.2020.04.008

- 1  
2  
3 34. Wu AW. Medical error: the second victim. The doctor who makes the mistake needs  
4 help too. *BMJ* 2000;**320**:726-27. doi: 10.1136/bmj.320.7237.726  
5  
6  
7  
8  
9 35. Grant S, Davidson K, Manages K, *et al*. Creating Healthful Work Environments to  
10 Deliver on the Quadruple Aim: A Call to Action. *J Nurs Adm* 2020;**50**:314-21. doi:  
11 10.1097/NNA.0000000000000891  
12  
13  
14  
15  
16 36. Rangachari P, Woods J. Preserving Organizational Resilience, Patient Safety, and  
17 Staff Retention during COVID-19 Requires a Holistic Consideration of the Psychological  
18 Safety of Healthcare Workers. *Int J Environ Res Public Health* 2020;**17**:E1267. doi:  
19 10.3390/ijerph17124267  
20  
21  
22  
23  
24  
25  
26 37. Wu AW, Connors C, Everly Jr GS. COVID-19: Peer Support and Crisis  
27 Communication Strategies to Promote Institutional Resilience. *Ann Intern Med* 2020;  
28 M20-1236. doi: 10.7326/M20-1236  
29  
30  
31  
32  
33  
34 38. Albott CS, Wozniak JR, McGlinch BP, *et al*. Battle Buddies: Rapid Deployment of a  
35 Psychological Resilience Intervention for Health Care Workers During the COVID-19  
36 Pandemic. *Anesth Analg* 2020;**131**:43-54. doi:10.1213/ANE.0000000000004912  
37  
38  
39  
40  
41  
42 39. Ahorsu DK, Lin CY, Imani V, *et al*. The Fear of COVID-19 Scale: Development and  
43 Initial Validation. *Int J Ment Health Addict* 2020;1-9. doi:10.1007/s11469-020-00270-8  
44  
45  
46  
47 40. Chandu VC, Pachava S, Vadapalli V, *et al*. Development and Initial Validation of the  
48 COVID-19 Anxiety Scale. *Indian J Public Health* 2020;**64**:S201-04.  
49 doi:10.4103/ijph.IJPH\_492\_20  
50  
51  
52  
53  
54 41. Taylor S, Landry CA, Paluszek MM, *et al*. Development and initial validation of the  
55 COVID Stress Scales. *J Anxiety Disord* 2020;**72**:102232.  
56  
57  
58  
59  
60 doi:10.1016/j.janxdis.2020.102232

Table 1. EASE Scores on the COVID-19 Acute Stress in Care Scale

|                                                                                                                                          | Mean (IC<br>95%)   | SD  | It often<br>happens to me<br>(%) | I am like this<br>all the time (%) |
|------------------------------------------------------------------------------------------------------------------------------------------|--------------------|-----|----------------------------------|------------------------------------|
| I can't help but think of recent critical situations. I can't get out of work.                                                           | 1.5 (1.4 – 1.6)    | 1.0 | 33.4                             | 16.4                               |
| I have completely lost the taste for things that gave me peace of mind.                                                                  | 1.1 (1.0 – 1.2)    | 0.9 | 25.5                             | 8.0                                |
| I keep my distance, I resent dealing with people, I'm irascible even at home.                                                            | 1.3 (1.2 – 1.4)    | 1.0 | 24.4                             | 12.8                               |
| I feel that I am neglecting many people who need my help.                                                                                | 1.0 (0.9 – 1.1)    | 1.0 | 21.5                             | 9.2                                |
| I have difficulty thinking and making decisions, I have many doubts, I have entered a kind of emotional blockage.                        | 1.1 (1.0 – 1.1)    | 1.0 | 23.1                             | 8.9                                |
| I feel intense physiological reactions (shocks, sweating, dizziness, shortness of breath, insomnia, etc.) related to the current crisis. | 1.2 (1.1 – 1.3)    | 1.0 | 25.5                             | 11.2                               |
| I feel on permanent alert. I believe that my reactions now put other patients, my colleagues, or myself at risk.                         | 1.0 (0.9 – 1.1)    | 1.0 | 20.7                             | 9.9                                |
| Worrying about not getting sick causes me a strain that's hard to bear.                                                                  | 0.9 (0.8 – 1.0)    | 0.9 | 16.4                             | 7.6                                |
| I'm afraid I'm going to infect my family.                                                                                                | 1.5 (1.4 – 1.6)    | 1.0 | 28.2                             | 20.7                               |
| I have difficulty empathizing with patients' suffering or connecting with their situation (emotional distancing, emotional anaesthesia). | 0.6 (0.5 – 0.7)    | 0.9 | 11.7                             | 5.8                                |
| Total score                                                                                                                              | 11.1 (10.6 – 11.6) | 6.7 | 23.9                             | 4.5                                |

|                              |                 |     |
|------------------------------|-----------------|-----|
| Factor 1. Affective response | 3.6 (3.4 – 3.8) | 2.4 |
| Factor 2. Fears and anxiety  | 3.8 (3.6 – 4.0) | 2.5 |

N=685

Scores from 0 to 3 points on each of the items on the scale

Scores from 0 to 30 in total on the scale

Score transformed from 0 to 10 points by a factor of 1

Score transformed from 0 to 10 points in factor 2

Mean difference between factors p=0.2

Table 2. Mean difference on EASE Scale between territories most and least affected by the SARS-CoV-2 pandemic

|                                                                                                                                          | Most affected territories <sup>a</sup> | Least affected territories <sup>b</sup> | p     |
|------------------------------------------------------------------------------------------------------------------------------------------|----------------------------------------|-----------------------------------------|-------|
| I can't help but think of recent critical situations. I can't get out of work.                                                           | 1.6                                    | 1.4                                     | 0.06  |
| I have completely lost the taste for things that gave me peace of mind.                                                                  | 1.1                                    | 1.1                                     | 0.50  |
| I keep my distance, I resent dealing with people, I'm irascible even at home.                                                            | 1.4                                    | 1.1                                     | 0.004 |
| I feel that I am neglecting many people who need my help.                                                                                | 1.1                                    | 0.9                                     | 0.12  |
| I have difficulty thinking and making decisions, I have many doubts, I have entered a kind of emotional blockage.                        | 1.2                                    | 1.0                                     | 0.37  |
| I feel intense physiological reactions (shocks, sweating, dizziness, shortness of breath, insomnia, etc.) related to the current crisis. | 1.3                                    | 0.8                                     | 0.00  |
| I feel on permanent alert. I believe that my reactions now put other patients, my colleagues, or myself at risk.                         | 1.1                                    | 0.7                                     | 0.02  |
| Worrying about not getting sick causes me a strain that's hard to bear.                                                                  | 1.0                                    | 0.6                                     | 0.004 |
| I'm afraid I'm going to infect my family.                                                                                                | 1.7                                    | 1.3                                     | 0.004 |
| I have difficulty empathizing with patients' suffering or connecting with their situation (emotional distancing, emotional anaesthesia). | 0.7                                    | 0.6                                     | 0.93  |
| Total score                                                                                                                              | 12.1                                   | 9.3                                     | 0.003 |
| Factor 1. Affective response                                                                                                             | 3.9                                    | 3.3                                     | 0.09  |
| Factor 2. Fears and anxiety                                                                                                              | 4.2                                    | 2.8                                     | 0.00  |

N=336

Scores from 0 to 3 points on each of the items on the scale

Scores from 0 to 30 in total on the scale

Score transformed from 0 to 10 points by a factor of 1

Score transformed from 0 to 10 points in factor 2

<sup>a</sup> Madrid y Cataluña (more than 5000 deaths by May the 17<sup>th</sup> 2020)

1  
2  
3  
4  
5  
6  
7  
8  
9  
10  
11  
12  
13  
14  
15  
16  
17  
18  
19  
20  
21  
22  
23  
24  
25  
26  
27  
28  
29  
30  
31  
32  
33  
34  
35  
36  
37  
38  
39  
40  
41  
42  
43  
44  
45  
46  
47  
48  
49  
50  
51  
52  
53  
54  
55  
56  
57  
58  
59  
60

---

<sup>b</sup> Asturias, Baleares, Canarias, Cantabria, Extremadura, La Rioja, Murcia y Navarra (less than 500 deaths by May the 17<sup>th</sup> 2020)

For peer review only

Table 3. Mean difference at four temporal moments of expansion of the SARS-COV-2 pandemic

|                                                                                                                                          | Impact <sup>a</sup> | Heroic <sup>b</sup> | Honeymoon <sup>c</sup> | Disillusionment <sup>d</sup> | p      |
|------------------------------------------------------------------------------------------------------------------------------------------|---------------------|---------------------|------------------------|------------------------------|--------|
| I can't help but think of recent critical situations. I can't get out of work.                                                           | 1.3                 | 1.4                 | 1.3                    | 1.6                          | <0.001 |
| I have completely lost the taste for things that gave me peace of mind.                                                                  | 0.6                 | 1.0                 | 1.1                    | 1.2                          | <0.001 |
| I keep my distance, I resent dealing with people, I'm irascible even at home.                                                            | 0.5                 | 1.1                 | 1.1                    | 1.5                          | <0.001 |
| I feel that I am neglecting many people who need my help.                                                                                | 0.7                 | 0.9                 | 0.9                    | 1.2                          | 0.01   |
| I have difficulty thinking and making decisions, I have many doubts, I have entered a kind of emotional blockage.                        | 0.8                 | 0.9                 | 0.9                    | 1.3                          | <0.001 |
| I feel intense physiological reactions (shocks, sweating, dizziness, shortness of breath, insomnia, etc.) related to the current crisis. | 0.7                 | 1.0                 | 1.1                    | 1.4                          | <0.001 |
| I feel on permanent alert. I believe that my reactions now put other patients, my colleagues, or myself at risk.                         | 1.0                 | 0.9                 | 0.8                    | 1.2                          | <0.001 |
| Worrying about not getting sick causes me a strain that's hard to bear.                                                                  | 0.9                 | 0.9                 | 0.8                    | 1.0                          | 0,22   |
| I'm afraid I'm going to infect my family.                                                                                                | 1.6                 | 1,3                 | 1,3                    | 1,7                          | <0.001 |
| I have difficulty empathizing with patients' suffering or connecting with their situation                                                | 0.4                 | 0.7                 | 0.5                    | 0.6                          | 0.42   |

|                                                   |     |      |     |      |        |
|---------------------------------------------------|-----|------|-----|------|--------|
| (emotional distancing,<br>emotional anaesthesia). |     |      |     |      |        |
| Total score                                       | 8.5 | 10.2 | 9.8 | 12.7 | <0.001 |
| Factor 1. Affective response                      | 2.4 | 3.3  | 3.3 | 4.1  | <0.001 |
| Factor 2. Fears and anxiety                       | 3.5 | 3.5  | 3.3 | 4.4  | <0.001 |

N=685

Scores from 0 to 3 points on each of the items on the scale

Scores from 0 to 30 in total on the scale

Score transformed from 0 to 10 points by a factor of 1

Score transformed from 0 to 10 points in factor 2

<sup>a</sup> From March 18<sup>th</sup> to March 25<sup>th</sup>, 2020 (less than 500 deaths per day)

<sup>b</sup> From March 28<sup>th</sup> to April 15<sup>th</sup>, 2020 (between 600 - 900 deaths per day)

<sup>c</sup> From April 16<sup>th</sup> to April 26<sup>th</sup>, 2020 (between 300 - 600 deaths per day)

<sup>d</sup> From April 27<sup>th</sup> to May 17<sup>th</sup>, 2020 (less than 300 deaths per day)



## Supplementary file. Acute Stress of Health Professionals Caring COVID-19 Scale (EASE SCALE)

Please answer the following questions according to the thoughts, emotions, sensations and actions you are experiencing during these days of crisis

|                                                                                                                                                   | It's not<br>happening to me | It happens to me<br>in concrete<br>situations | It often happens<br>to me | I'm like this all<br>the time |
|---------------------------------------------------------------------------------------------------------------------------------------------------|-----------------------------|-----------------------------------------------|---------------------------|-------------------------------|
| I can't help but think of recent critical situations. I can't get out of work                                                                     | <input type="checkbox"/>    | <input type="checkbox"/>                      | <input type="checkbox"/>  | <input type="checkbox"/>      |
| I have completely lost the taste for things that gave me peace of mind                                                                            | <input type="checkbox"/>    | <input type="checkbox"/>                      | <input type="checkbox"/>  | <input type="checkbox"/>      |
| I keep my distance, I resent dealing with people, I'm irascible even at home                                                                      | <input type="checkbox"/>    | <input type="checkbox"/>                      | <input type="checkbox"/>  | <input type="checkbox"/>      |
| I feel that I am neglecting many people who need my help                                                                                          | <input type="checkbox"/>    | <input type="checkbox"/>                      | <input type="checkbox"/>  | <input type="checkbox"/>      |
| I have difficulty thinking and making decisions, I have many doubts, I have entered a kind of emotional blockage                                  | <input type="checkbox"/>    | <input type="checkbox"/>                      | <input type="checkbox"/>  | <input type="checkbox"/>      |
| I feel intense physiological reactions (shocks, sweating, dizziness, shortness of breath, insomnia, etc.) related to the current crisis situation | <input type="checkbox"/>    | <input type="checkbox"/>                      | <input type="checkbox"/>  | <input type="checkbox"/>      |
| I feel on permanent alert. I believe that my reactions now put other patients, my colleagues or myself at risk                                    | <input type="checkbox"/>    | <input type="checkbox"/>                      | <input type="checkbox"/>  | <input type="checkbox"/>      |
| Worrying about not getting sick causes me a strain that's hard to bear                                                                            | <input type="checkbox"/>    | <input type="checkbox"/>                      | <input type="checkbox"/>  | <input type="checkbox"/>      |
| I'm afraid I'm going to infect my family                                                                                                          | <input type="checkbox"/>    | <input type="checkbox"/>                      | <input type="checkbox"/>  | <input type="checkbox"/>      |
| I have difficulty empathizing with patients' suffering or connecting with their situation (emotional distancing, emotional anesthesia)            | <input type="checkbox"/>    | <input type="checkbox"/>                      | <input type="checkbox"/>  | <input type="checkbox"/>      |

STROBE Statement—Checklist of items that should be included in reports of *cross-sectional studies*

|                              | Item No                                                                            | Recommendation                                                                                                                                                                                    | Page No      |
|------------------------------|------------------------------------------------------------------------------------|---------------------------------------------------------------------------------------------------------------------------------------------------------------------------------------------------|--------------|
| <b>Title and abstract</b>    | 1                                                                                  | (a) Indicate the study's design with a commonly used term in the title or the abstract                                                                                                            | 1-2          |
|                              |                                                                                    | (b) Provide in the abstract an informative and balanced summary of what was done and what was found                                                                                               | 2            |
| <b>Introduction</b>          |                                                                                    |                                                                                                                                                                                                   |              |
| Background/rationale         | 2                                                                                  | Explain the scientific background and rationale for the investigation being reported                                                                                                              | 4-5          |
| Objectives                   | 3                                                                                  | State specific objectives, including any prespecified hypotheses                                                                                                                                  | 5            |
| <b>Methods</b>               |                                                                                    |                                                                                                                                                                                                   |              |
| Study design                 | 4                                                                                  | Present key elements of study design early in the paper                                                                                                                                           | 5            |
| Setting                      | 5                                                                                  | Describe the setting, locations, and relevant dates, including periods of recruitment, exposure, follow-up, and data collection                                                                   | 5-6          |
| Participants                 | 6                                                                                  | (a) Give the eligibility criteria, and the sources and methods of selection of participants                                                                                                       | 6            |
| Variables                    | 7                                                                                  | Clearly define all outcomes, exposures, predictors, potential confounders, and effect modifiers. Give diagnostic criteria, if applicable                                                          | 5            |
| Data sources/<br>measurement | 8*                                                                                 | For each variable of interest, give sources of data and details of methods of assessment (measurement). Describe comparability of assessment methods if there is more than one group              | 5            |
| Bias                         | 9                                                                                  | Describe any efforts to address potential sources of bias                                                                                                                                         | -            |
| Study size                   | 10                                                                                 | Explain how the study size was arrived at                                                                                                                                                         | 5, 7         |
| Quantitative variables       | 11                                                                                 | Explain how quantitative variables were handled in the analyses. If applicable, describe which groupings were chosen and why                                                                      | 6-7          |
| Statistical methods          | 12                                                                                 | (a) Describe all statistical methods, including those used to control for confounding                                                                                                             | 7            |
|                              |                                                                                    | (b) Describe any methods used to examine subgroups and interactions                                                                                                                               | 6-7          |
|                              | (c) Explain how missing data were addressed                                        | -                                                                                                                                                                                                 |              |
|                              | (d) If applicable, describe analytical methods taking account of sampling strategy | 6-7                                                                                                                                                                                               |              |
|                              | (e) Describe any sensitivity analyses                                              | -                                                                                                                                                                                                 |              |
| <b>Results</b>               |                                                                                    |                                                                                                                                                                                                   |              |
| Participants                 | 13*                                                                                | (a) Report numbers of individuals at each stage of study—eg numbers potentially eligible, examined for eligibility, confirmed eligible, included in the study, completing follow-up, and analysed | 7            |
|                              |                                                                                    | (b) Give reasons for non-participation at each stage                                                                                                                                              | -            |
|                              |                                                                                    | (c) Consider use of a flow diagram                                                                                                                                                                | -            |
| Descriptive data             | 14*                                                                                | (a) Give characteristics of study participants (eg demographic, clinical, social) and information on exposures and potential confounders                                                          | 7            |
|                              |                                                                                    | (b) Indicate number of participants with missing data for each variable of interest                                                                                                               | -            |
| Outcome data                 | 15*                                                                                | Report numbers of outcome events or summary measures                                                                                                                                              | 7-8<br>15-17 |

|    |                          |    |                                                                                                                                                                                                              |
|----|--------------------------|----|--------------------------------------------------------------------------------------------------------------------------------------------------------------------------------------------------------------|
| 1  |                          |    |                                                                                                                                                                                                              |
| 2  | Main results             | 16 | (a) Give unadjusted estimates and, if applicable, confounder-adjusted estimates and their precision (eg, 95% confidence interval). Make clear which confounders were adjusted for and why they were included |
| 3  |                          |    | 7-8                                                                                                                                                                                                          |
| 4  |                          |    | 15-17                                                                                                                                                                                                        |
| 5  |                          |    |                                                                                                                                                                                                              |
| 6  |                          |    | (b) Report category boundaries when continuous variables were categorized                                                                                                                                    |
| 7  |                          |    | 7-8                                                                                                                                                                                                          |
| 8  |                          |    | 15                                                                                                                                                                                                           |
| 9  |                          |    | (c) If relevant, consider translating estimates of relative risk into absolute risk for a meaningful time period                                                                                             |
| 10 |                          |    | -                                                                                                                                                                                                            |
| 11 | Other analyses           | 17 | Report other analyses done—eg analyses of subgroups and interactions, and sensitivity analyses                                                                                                               |
| 12 |                          |    | -                                                                                                                                                                                                            |
| 13 | <b>Discussion</b>        |    |                                                                                                                                                                                                              |
| 14 | Key results              | 18 | Summarise key results with reference to study objectives                                                                                                                                                     |
| 15 |                          |    | 9                                                                                                                                                                                                            |
| 16 | Limitations              | 19 | Discuss limitations of the study, taking into account sources of potential bias or imprecision. Discuss both direction and magnitude of any potential bias                                                   |
| 17 |                          |    | 10-11                                                                                                                                                                                                        |
| 18 |                          |    |                                                                                                                                                                                                              |
| 19 | Interpretation           | 20 | Give a cautious overall interpretation of results considering objectives, limitations, multiplicity of analyses, results from similar studies, and other relevant evidence                                   |
| 20 |                          |    | 9-10                                                                                                                                                                                                         |
| 21 |                          |    |                                                                                                                                                                                                              |
| 22 | Generalisability         | 21 | Discuss the generalisability (external validity) of the study results                                                                                                                                        |
| 23 |                          |    | 10-11                                                                                                                                                                                                        |
| 24 | <b>Other information</b> |    |                                                                                                                                                                                                              |
| 25 | Funding                  | 22 | Give the source of funding and the role of the funders for the present study and, if applicable, for the original study on which the present article is based                                                |
| 26 |                          |    | 3                                                                                                                                                                                                            |
| 27 |                          |    |                                                                                                                                                                                                              |
| 28 |                          |    |                                                                                                                                                                                                              |
| 29 |                          |    |                                                                                                                                                                                                              |
| 30 |                          |    |                                                                                                                                                                                                              |

\*Give information separately for exposed and unexposed groups.

**Note:** An Explanation and Elaboration article discusses each checklist item and gives methodological background and published examples of transparent reporting. The STROBE checklist is best used in conjunction with this article (freely available on the Web sites of PLoS Medicine at <http://www.plosmedicine.org/>, Annals of Internal Medicine at <http://www.annals.org/>, and Epidemiology at <http://www.epidem.com/>). Information on the STROBE Initiative is available at [www.strobe-statement.org](http://www.strobe-statement.org).
